# Supplementary material for: Highly regioselective iridium-catalyzed and samarium-promoted coupling of allylic carbonates with ketones: a new approach towards homoallylic alcohols
Source: Royal Society of Chemistry journal article supplement (doi:10.1039/c3ra43199a), 2013-01-01
Supplement: c3ra43199a.pdf [file c3ra43199a.pdf]

# Highly regioselective iridium-catalyzed and samarium-promoted coupling of allylic carbonates with ketones: New approach toward homoallylic alcohols

Wei Liu, Liang Zhang, Weikang Yang, and Xiaoming Zhao\*

Department of Chemistry, Tongji University, 1239 Siping Road, Shanghai 200092, PR China

## Supporting Information

|                                   |         |
|-----------------------------------|---------|
| Experimental section.....         | S2-S4   |
| <sup>1</sup> H NMR spectra .....  | S5-S11  |
| <sup>13</sup> C NMR spectra ..... | S12-S17 |
| <sup>19</sup> F NMR spectra.....  | S18     |
| References.....                   | S19     |

## Experimental section

General:  $^1\text{H}$ ,  $^{13}\text{C}$ , and  $^{19}\text{F}$  NMR spectra were recorded as solutions in  $\text{CDCl}_3$  with a Bruker NMR (400 MHz) spectrometer. The chemical shifts are reported in  $\delta$  units downfield from the  $\text{Me}_4\text{Si}$  internal reference. High-resolution mass spectra were obtained with a Finnigan VG Platform or a Finnigan MAT 95S.

Reaction procedure for preparation of **3**:  $[\text{Ir}(\text{COD})\text{Cl}]_2$  (2.6 mg, 0.004 mmol) was dissolved in THF (5 mL) with  $\text{SmI}_2$  (0.1 M) in a Schlenk tube under argon. Allylic carbonate **1** (0.2 mmol) and ketone **2a** (0.3 mmol) or **2b** (0.4 mmol) were dissolved in THF (2.5 mL), then the solution was slowly added to the Schlenk tube *via* a syringe pump during 1 h. The mixture was stirred for an additional period of 5 h. The crude reaction mixture was filtered through celite and the solvent was removed by rotary evaporation. The crude residue was purified by flash column chromatography (ethyl acetate/petroleum ether, 1:10) to give the desired products.

Procedure for preparation of **3ea,3ja**: compound **3a** or **3j** (0.10 mmol) was dissolved in EtOH (2 mL) with 10% Pd/C (3 mg) in a Schlenk tube under  $\text{H}_2$ . The solution was stirred at 60 °C in 12 h. The solvent was removed by rotary evaporation. Then the crude residue was purified by flash column chromatography (ethyl acetate/petroleum ether, 1:10) to give the desired product **3ea, 3ja**.

Procedure for preparation of **3eb,3jb**: **3ea** or **3ja** (0.10 mmol) was dissolved in dry DCM (2 mL) in a Schlenk tube under argon. Diethylaminosulfur trifluoride (DAST) (0.15 mmol) was added by a syringe at room temperature. The solution was stirred for 5 min, and then  $\text{NaHCO}_3$  solution (2 mL, 1.5 M) was added. After stirred for an additional 5 min, the mixture was extracted with DCM. The organic layer was dried with  $\text{MgSO}_4$  and the solvent was removed under reduced pressure. Then the crude residue was purified by flash column chromatography (petroleum ether) to give the desired product **3eb,3jb**.

1-Cinnamylcyclohexanol (**3a**).<sup>2</sup> Colorless oil. Yield: 35.9 mg (83%).  $^1\text{H}$  NMR (400 MHz,  $\text{CDCl}_3$ )  $\delta$  = 7.41 (d,  $J$  = 7.3 Hz, 2H), 7.33 (t,  $J$  = 7.5 Hz, 2H), 7.24 (t,  $J$  = 7.2 Hz, 1H), 6.49 (d,  $J$  = 15.9 Hz, 1H), 6.34 (dt,  $J$  = 15.8, 7.5 Hz, 2H), 2.40 (d,  $J$  = 7.5 Hz, 2H), 1.71-1.46 (m, 10H).

(*E*)-1-(3-(3-Methoxyphenyl)allyl)cyclohexanol (**3b**). Colorless oil. Yield: 37.4 mg (76%).  $^1\text{H}$  NMR (400 MHz,  $\text{CDCl}_3$ )  $\delta$  = 7.23 (dd,  $J$  = 16.1, 8.2 Hz, 1H), 6.96 (d,  $J$  = 7.6 Hz, 1H), 6.91 (s, 1H), 6.77 (d,  $J$  = 8.2 Hz, 1H), 6.42 (d,  $J$  = 15.9 Hz, 1H), 6.31 (dt,  $J$  = 15.4, 7.7 Hz, 1H), 3.81 (s, 3H), 2.36 (d,  $J$  = 7.4 Hz, 2H), 1.65-1.45 (m, 10H).  $^{13}\text{C}$  NMR (100 Hz,  $\text{CDCl}_3$ )  $\delta$  = 159.8, 138.9, 133.5, 129.5, 125.8, 118.8, 112.9, 111.5, 71.6, 55.2, 45.9, 37.6, 25.8, 22.2. HRMS (ESI) calcd for  $\text{C}_{16}\text{H}_{22}\text{O}_2\text{Na}$ ,  $[\text{M}+\text{Na}]^+$ : 269.1517, Found: 269.1474. IR(KBr):  $\nu_{\text{max}}$  ( $\text{cm}^{-1}$ ) = 3780, 3610, 3453, 3125, 2450, 1555, 1450, 1230, 1157, 1142, 1121, 1055, 998, 755, 600, 490.

(*E*)-1-(3-(*p*-Tolyl)allyl)cyclohexanol (**3c**). Colorless oil. Yield: 33.0 mg (72%).  $^1\text{H}$  NMR (400 MHz,  $\text{CDCl}_3$ )  $\delta$  = 7.30 (d,  $J$  = 8.0 Hz, 2H), 7.14 (d,  $J$  = 7.9 Hz, 2H), 6.45 (d,  $J$  = 15.8 Hz, 1H), 6.29 (dt,  $J$  = 15.6, 7.8 Hz, 1H), 2.38 (d,  $J$  = 7.7 Hz, 2H), 2.36 (s, 3H), 1.70-1.47 (m, 10H).  $^{13}\text{C}$  NMR (100 MHz,  $\text{CDCl}_3$ )  $\delta$  = 135.9, 132.7, 132.3, 128.7, 127.3, 126.3, 71.6, 45.9, 37.6, 29.7, 25.7, 22.3. HRMS (ESI) calcd for  $\text{C}_{16}\text{H}_{22}\text{ONa}$ ,  $[\text{M}+\text{Na}]^+$ : 253.1568, Found: 253.1558. IR(KBr):  $\nu_{\text{max}}$  ( $\text{cm}^{-1}$ ) = 3770, 3650, 3443, 3225, 2450, 1505, 1220, 1150, 1117, 1040, 740, 600.

(*E*)-1-(3-(2-Chlorophenyl)allyl)cyclohexanol (**3d**). Colorless oil. Yield: 25.0 mg (50%).  $^1\text{H}$  NMR (400 MHz,  $\text{CDCl}_3$ )  $\delta$  = 7.53 (dd,  $J$  = 7.6, 1.3 Hz, 1H), 7.37-7.31 (m, 1H), 7.17 (m, 2H), 6.82 (d,  $J$  = 15.8 Hz, 1H), 6.30

(dt,  $J = 15.5, 7.6$  Hz, 1H), 2.42 (d,  $J = 7.6$  Hz, 2H), 1.68-1.44 (m, 10H).  $^{13}\text{C}$  NMR (100 MHz,  $\text{CDCl}_3$ )  $\delta = 135.6, 132.6, 129.7, 129.6, 128.7, 128.2, 126.8, 126.8, 71.6, 46.0, 37.6, 25.7, 22.2$ . HRMS (ESI) calcd for  $\text{C}_{15}\text{H}_{19}\text{ClONa}$ .  $[\text{M}+\text{Na}]^+$ : 273.1022, Found: 273.1026. IR(KBr):  $\nu_{\text{max}}$  ( $\text{cm}^{-1}$ ) = 3730, 3655, 3435, 3158, 2422, 1578, 1456, 1225, 1158, 1147, 1154, 1152, 980, 765, 652.

(*E*)-1-(3-([1,1'-Biphenyl]-4-yl)allyl)cyclohexanol (**3e**). White solid. Melting point: 85–86°C. Yield: 28.6 mg (49%).  $^1\text{H}$  NMR (400 MHz,  $\text{CDCl}_3$ )  $\delta = 7.63$  (d,  $J = 7.2$  Hz, 2H), 7.58 (d,  $J = 8.3$  Hz, 2H), 7.47 (t,  $J = 8.3$  Hz, 4H), 7.37 (t,  $J = 7.3$  Hz, 1H), 6.53 (d,  $J = 15.9$  Hz, 1H), 6.39 (dt,  $J = 15.8, 7.2$  Hz, 1H), 2.42 (d,  $J = 7.4$  Hz, 2H), 1.71-1.48 (m, 10H).  $^{13}\text{C}$  NMR (100 MHz,  $\text{CDCl}_3$ )  $\delta = 140.8, 140.0, 136.5, 133.2, 128.8, 127.3, 126.9, 126.6, 125.6, 71.7, 46.0, 37.6, 25.8, 22.2$ . HRMS (ESI) calcd for  $\text{C}_{21}\text{H}_{24}\text{ONa}$ .  $[\text{M}+\text{Na}]^+$ : 315.1725, Found: 315.1718. IR(KBr):  $\nu_{\text{max}}$  ( $\text{cm}^{-1}$ ) = 3885, 3652, 3553, 3120, 2435, 1570, 1447, 1215, 1168, 1157, 1065, 998, 765, 580.

1-(3-([1,1'-Biphenyl]-4-yl)propyl)cyclohexanol (**3ea**). Colorless oil. Yield: 28.6 mg (99%).  $^1\text{H}$  NMR (400 MHz,  $\text{CDCl}_3$ )  $\delta = 7.62$  (d,  $J = 7.2$  Hz, 2H), 7.55 (d,  $J = 8.1$  Hz, 2H), 7.46 (t,  $J = 7.6$  Hz, 2H), 7.35 (t,  $J = 7.3$  Hz, 1H), 7.29 (d,  $J = 8.3$  Hz, 2H), 2.69 (t,  $J = 7.7$  Hz, 2H), 1.82-1.71 (m, 2H), 1.65-1.42 (m, 10H), 1.39-1.21 (m, 2H).  $^{13}\text{C}$  NMR (100 MHz,  $\text{CDCl}_3$ )  $\delta = 141.7, 141.2, 138.7, 128.8, 128.7, 127.1, 127.0, 71.4, 42.1, 37.5, 36.0, 25.9, 24.8, 22.3$ . HRMS (ESI) calcd for  $\text{C}_{21}\text{H}_{26}\text{ONa}$ .  $[\text{M}+\text{Na}]^+$ : 317.1881, Found: 317.1890. IR(KBr):  $\nu_{\text{max}}$  ( $\text{cm}^{-1}$ ) = 3875, 3620, 3553, 3135, 2440, 1655, 1550, 1330, 1165, 1150, 1120, 1080, 787, 650, 500.

4-(3-(1-Fluorocyclohexyl)propyl)-1,1'-biphenyl (**3eb**). Colorless oil. Yield: 22.1 mg (75%).  $^1\text{H}$  NMR (400 MHz,  $\text{CDCl}_3$ )  $\delta = 7.62$  (d,  $J = 7.3$  Hz, 2H), 7.55 (d,  $J = 8.0$  Hz, 2H), 7.46 (t,  $J = 7.6$  Hz, 2H), 7.36 (t,  $J = 7.3$  Hz, 1H), 7.30 (d,  $J = 8.3$  Hz, 2H), 2.70 (t,  $J = 7.5$  Hz, 2H), 1.91-1.75 (m, 4H), 1.73-1.60 (m, 5H), 1.58-1.44 (m, 3H), 1.41-1.23 (m, 2H).  $^{19}\text{F}$  NMR (377 MHz,  $\text{CDCl}_3$ )  $\delta = -155.6$ .  $^{13}\text{C}$  NMR (100 MHz,  $\text{CDCl}_3$ )  $\delta = 166.5, 139.9, 132.3, 132.2, 129.7, 126.1, 124.6, 122.9, 121.7, 64.8, 30.7, 29.7, 21.3, 19.2, 19.1, 13.7$ . HRMS (ESI) calcd for  $\text{C}_{21}\text{H}_{25}\text{FNa}$ .  $[\text{M}+\text{Na}]^+$ : 319.1838, Found: 319.1830. IR(KBr):  $\nu_{\text{max}}$  ( $\text{cm}^{-1}$ ) = 3880, 3650, 3120, 2455, 1678, 1562, 1352, 1171, 1100, 1070, 800, 653, 585.

(*E*)-2-Methyl-5-phenylpent-4-en-2-ol (**3f**).<sup>2</sup> Colorless oil. Yield: 31.3 mg (89%).  $^1\text{H}$  NMR (400 MHz,  $\text{CDCl}_3$ )  $\delta = 7.38$  (d,  $J = 7.3$  Hz, 2H), 7.31 (t,  $J = 7.5$  Hz, 2H), 7.23 (dd,  $J = 6.7, 6.7$  Hz, 1H), 6.47 (d,  $J = 15.8$  Hz, 1H), 6.30 (dt,  $J = 15.5, 7.8$  Hz, 1H), 2.39 (d,  $J = 7.5$  Hz, 2H), 1.28 (s, 6H).

(*E*)-2-Methyl-5-(*p*-tolyl)pent-4-en-2-ol (**3g**). Colorless oil. Yield: 29.6 mg (78%).  $^1\text{H}$  NMR (400 MHz,  $\text{CDCl}_3$ )  $\delta = 7.28$  (d,  $J = 8.0$  Hz, 2H), 7.12 (d,  $J = 7.9$  Hz, 2H), 6.43 (d,  $J = 15.8$  Hz, 1H), 6.24 (dt,  $J = 15.5, 7.8$  Hz, 1H), 2.37 (d,  $J = 7.5$  Hz, 2H), 2.33 (s, 3H), 1.27 (s, 6H).  $^{13}\text{C}$  NMR (100 MHz,  $\text{CDCl}_3$ )  $\delta = 137.1, 134.6, 133.6, 129.3, 126.1, 124.7, 70.9, 47.4, 29.3, 21.2$ . HRMS (ESI) calcd for  $\text{C}_{13}\text{H}_{18}\text{ONa}$ .  $[\text{M}+\text{Na}]^+$ : 213.1255, Found: 213.1250. IR(KBr):  $\nu_{\text{max}}$  ( $\text{cm}^{-1}$ ) = 3790, 3600, 3458, 3112, 2583, 1595, 1480, 1208, 1186, 1132, 1086, 795, 665, 508.

(*E*)-5-(4-Methoxyphenyl)-2-methylpent-4-en-2-ol (**3h**). Colorless oil. Yield: 30.9 mg (75%).  $^1\text{H}$  NMR (400 MHz,  $\text{CDCl}_3$ )  $\delta = 7.31$  (d,  $J = 8.6$  Hz, 2H), 6.85 (d,  $J = 8.6$  Hz, 2H), 6.41 (d,  $J = 15.8$  Hz, 1H), 6.14 (dt,  $J = 15.5, 7.6$  Hz, 1H), 3.81 (s, 3H), 2.36 (d,  $J = 7.6$  Hz, 2H), 1.27 (s, 6H).  $^{13}\text{C}$  NMR (100 MHz,  $\text{CDCl}_3$ )  $\delta = 159.0, 133.2, 130.2, 127.3, 123.4, 114.0, 70.9, 55.3, 47.3, 29.2$ . HRMS (ESI) calcd for  $\text{C}_{13}\text{H}_{18}\text{O}_2\text{Na}$ .  $[\text{M}+\text{Na}]^+$ : 229.1204, Found: 229.1211. IR(KBr):  $\nu_{\text{max}}$  ( $\text{cm}^{-1}$ ) = 3785, 3605, 3450, 3120, 2443, 1555, 1440, 1233, 1168, 1145, 1132, 1065, 777, 615, 500.

(*E*)-2-Methyl-5-(naphthalen-1-yl)pent-4-en-2-ol (**3i**). Colorless oil. Yield: 24.4 mg (54%).  $^1\text{H}$  NMR (400

MHz, CDCl<sub>3</sub>)  $\delta$  = 8.12 (d,  $J$  = 7.8 Hz, 1H), 7.87-7.83 (m, 1H), 7.77 (d,  $J$  = 8.2 Hz, 1H), 7.59 (d,  $J$  = 7.1 Hz, 1H), 7.54-7.41 (m, 3H), 7.21 (d,  $J$  = 15.5 Hz, 1H), 6.31 (dt,  $J$  = 15.4, 7.6 Hz, 1H), 2.51 (d,  $J$  = 7.6 Hz, 2H), 1.33 (s, 6H). <sup>13</sup>C NMR (100 MHz, CDCl<sub>3</sub>)  $\delta$  = 135.2, 133.6, 131.1, 131.0, 129.2, 128.5, 127.7, 126.0, 125.8, 125.7, 123.8, 123.8, 71.0, 47.8, 29.3. HRMS (ESI) calcd for C<sub>16</sub>H<sub>18</sub>ONa. [M+Na]<sup>+</sup>: 249.1255, Found: 249.1257. IR(KBr):  $\nu_{\text{max}}$  (cm<sup>-1</sup>) = 3800, 3750, 3554, 3085, 2395, 1600, 1480, 1250, 1158, 1100, 1085, 968, 727, 650, 490.

(*E*)-5-([1,1'-Biphenyl]-4-yl)-2-methylpent-4-en-2-ol (**3j**). White solid. Melting point 94–95°C. Yield: 21.7 mg (43%). <sup>1</sup>H NMR (400 MHz, CDCl<sub>3</sub>)  $\delta$  = 7.63 (d,  $J$  = 7.4 Hz, 2H), 7.59 (d,  $J$  = 8.2 Hz, 2H), 7.47 (dd,  $J$  = 10.2, 8.2 Hz, 4H), 7.37 (t,  $J$  = 7.3 Hz, 1H), 6.54 (d,  $J$  = 15.8 Hz, 1H), 6.39 (dt,  $J$  = 15.5, 7.8 Hz, 1H), 2.44 (d,  $J$  = 7.5 Hz, 2H), 1.32 (s, 6H). <sup>13</sup>C NMR (100 MHz, CDCl<sub>3</sub>)  $\delta$  = 140.8, 140.1, 136.4, 133.2, 128.8, 127.3, 126.9, 126.6, 126.0, 71.0, 47.4, 29.3. HRMS (ESI) calcd for C<sub>18</sub>H<sub>20</sub>ONa. [M+Na]<sup>+</sup>: 275.1412, Found: 275.1420. IR(KBr):  $\nu_{\text{max}}$  (cm<sup>-1</sup>) = 3810, 3790, 3533, 3145, 2650, 1575, 1478, 1211, 1137, 1100, 1055, 915, 705, 618, 500.

5-([1,1'-Biphenyl]-4-yl)-2-methylpentan-2-ol (**3ja**). White solid. Melting point 80–81°C. Yield: 21.7 mg (99%). <sup>1</sup>H NMR (400 MHz, CDCl<sub>3</sub>)  $\delta$  = 7.58 (d,  $J$  = 7.7 Hz, 2H), 7.52 (d,  $J$  = 8.0 Hz, 2H), 7.42 (t,  $J$  = 7.6 Hz, 2H), 7.32 (t,  $J$  = 7.3 Hz, 1H), 7.26 (d,  $J$  = 8.5 Hz, 2H), 2.66 (t,  $J$  = 7.6 Hz, 2H), 1.77-1.69 (m, 2H), 1.54 (dd,  $J$  = 11.2, 5.5 Hz, 2H), 1.22 (s, 6H). <sup>13</sup>C NMR (100 MHz, CDCl<sub>3</sub>)  $\delta$  = 141.6, 141.1, 138.7, 128.8, 128.7, 127.1, 127.0, 71.0, 43.5, 36.0, 29.3, 26.3. HRMS (ESI) calcd for C<sub>18</sub>H<sub>22</sub>ONa. [M+Na]<sup>+</sup>: 277.1568, Found: 277.1573. IR(KBr):  $\nu_{\text{max}}$  (cm<sup>-1</sup>) = 3910, 3720, 3358, 3205, 2650, 1745, 1500, 1600, 1157, 1121, 1050, 775, 615.

4-(4-Fluoro-4-methylpentyl)-1,1'-biphenyl (**3jb**). White solid. Melting point 49–50°C. Yield: 18.2 mg (71%). <sup>1</sup>H NMR (400 MHz, CDCl<sub>3</sub>)  $\delta$  = 7.61 (d,  $J$  = 7.6 Hz, 2H), 7.55 (d,  $J$  = 8.1 Hz, 2H), 7.46 (t,  $J$  = 7.6 Hz, 2H), 7.36 (t,  $J$  = 7.3 Hz, 1H), 7.29 (d,  $J$  = 7.6 Hz, 2H), 2.70 (t,  $J$  = 7.4 Hz, 2H), 1.84-1.65 (m, 4H), 1.40 (s, 3H), 1.35 (s, 3H). <sup>19</sup>F NMR (377 MHz, CDCl<sub>3</sub>)  $\delta$  = -137.5. <sup>13</sup>C NMR (100 MHz, CDCl<sub>3</sub>)  $\delta$  = 141.4, 141.1, 138.8, 128.8, 128.7, 127.1, 127.0, 41.1, 40.9, 35.7, 26.8, 26.6, 25.8, 25.8. HRMS (ESI) calcd for C<sub>18</sub>H<sub>21</sub>FNa. [M+Na]<sup>+</sup>: 279.1525, Found: 279.1519. IR(KBr):  $\nu_{\text{max}}$  (cm<sup>-1</sup>) = 3905, 3715, 3370, 3115, 2785, 1768, 1620, 1605, 1142, 1115, 1035, 760, 610.

Procedure for the preparation of **3a** from Grignard reagent such as (*E*)-cinnamylmagnesium chloride: (*E*)-Cinnamylmagnesium chloride (0.20 mmol, 2 mL) made according to a known procedure<sup>3</sup> was added by a syringe into a Schlenk tube under argon. Then a solution of cyclohexanone (0.30 mmol, 1.5 eq) and THF (1 mL) was slowly added into the reaction mixture by a syringe. The mixture was stirred for 12 h. The crude reaction mixture was filtered through celite and the solvent was removed by rotary evaporation. The crude residue was purified by flash column chromatography (ethyl acetate/petroleum ether = 1:10) to give the desired product **3a** in 46 % yield. <sup>1</sup>H NMR (400 MHz, CDCl<sub>3</sub>)  $\delta$  = 7.41 (d,  $J$  = 7.3 Hz, 2H), 7.33 (t,  $J$  = 7.5 Hz, 2H), 7.24 (t,  $J$  = 7.2 Hz, 1H), 6.49 (d,  $J$  = 15.9 Hz, 1H), 6.34 (dt,  $J$  = 15.8, 7.5 Hz, 2H), 2.40 (d,  $J$  = 7.5 Hz, 2H), 1.71-1.46 (m, 10H).

# <sup>1</sup>H NMR spectra

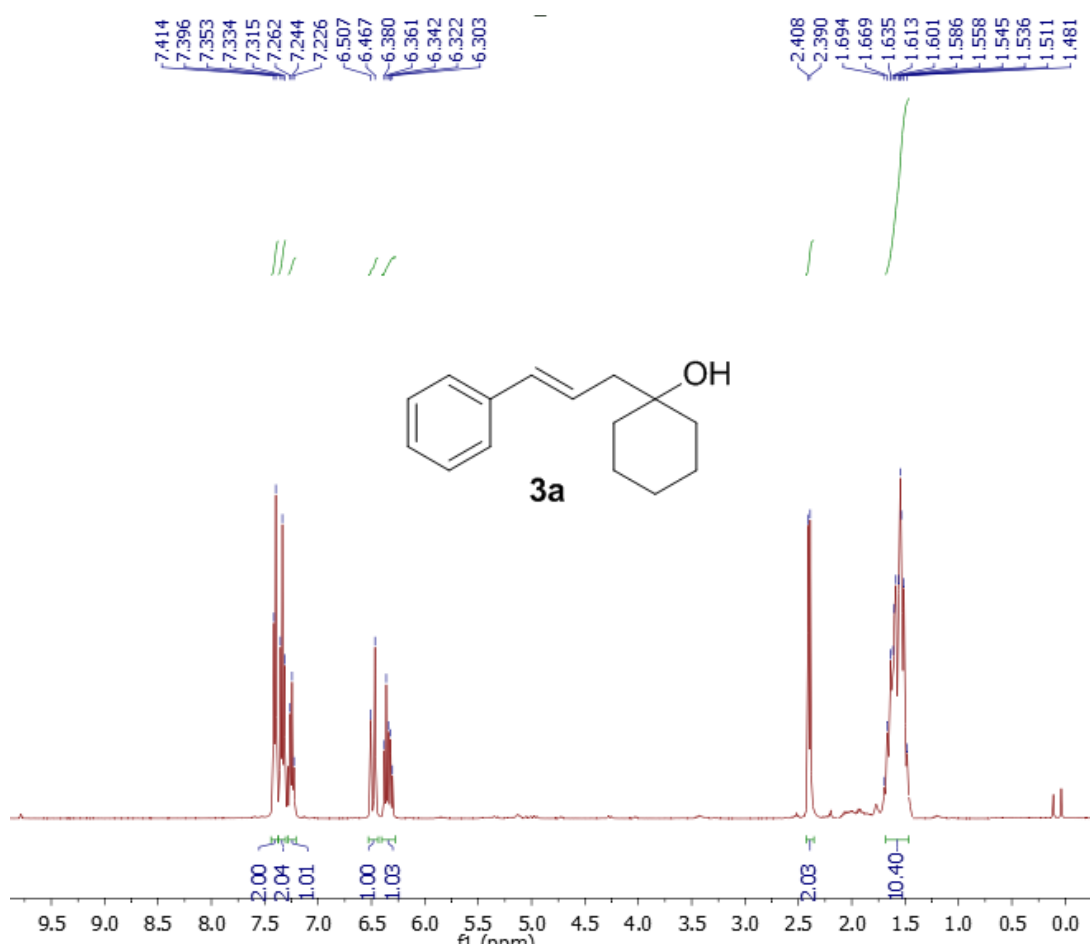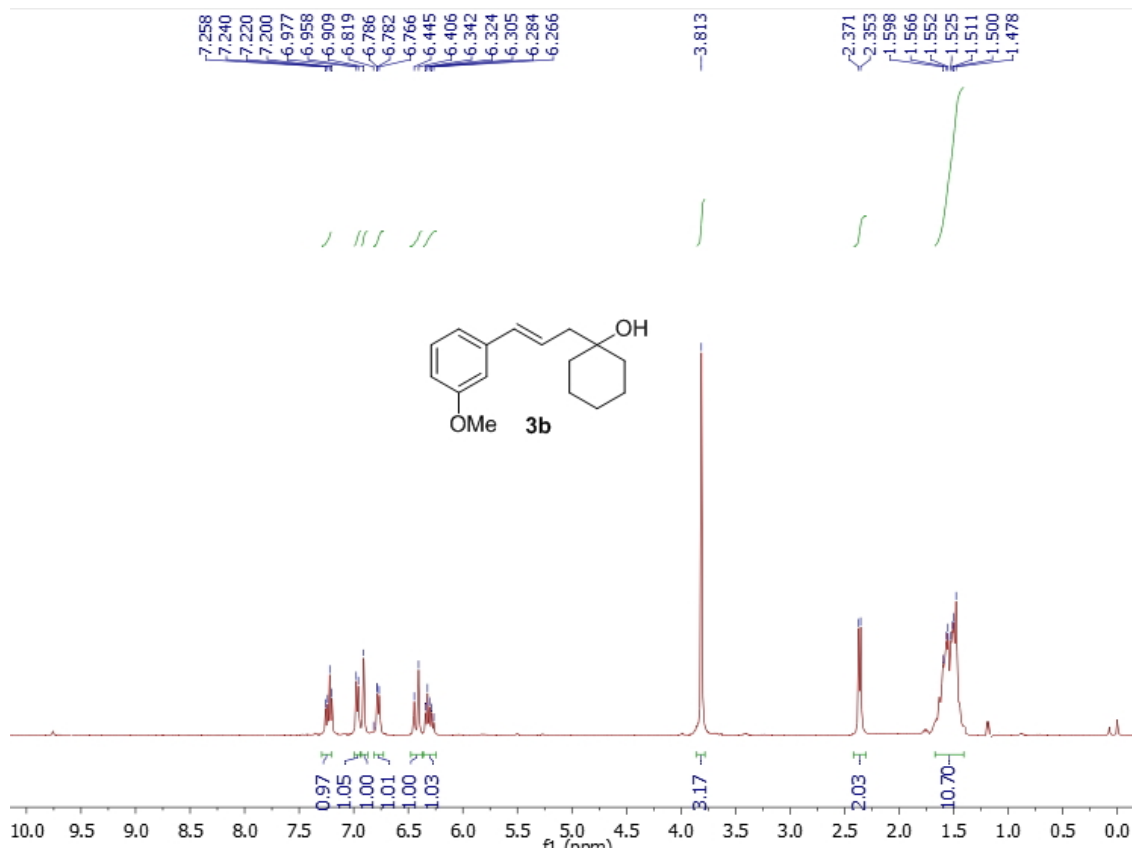

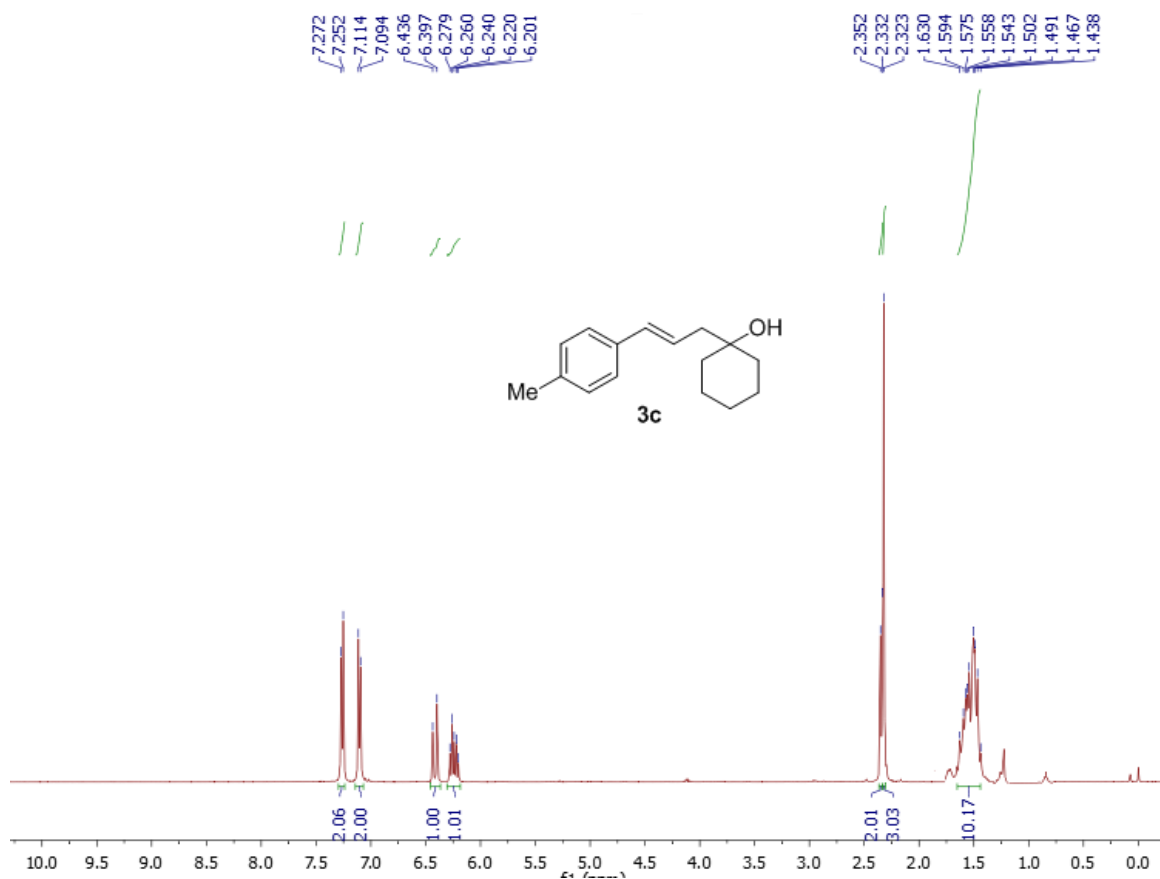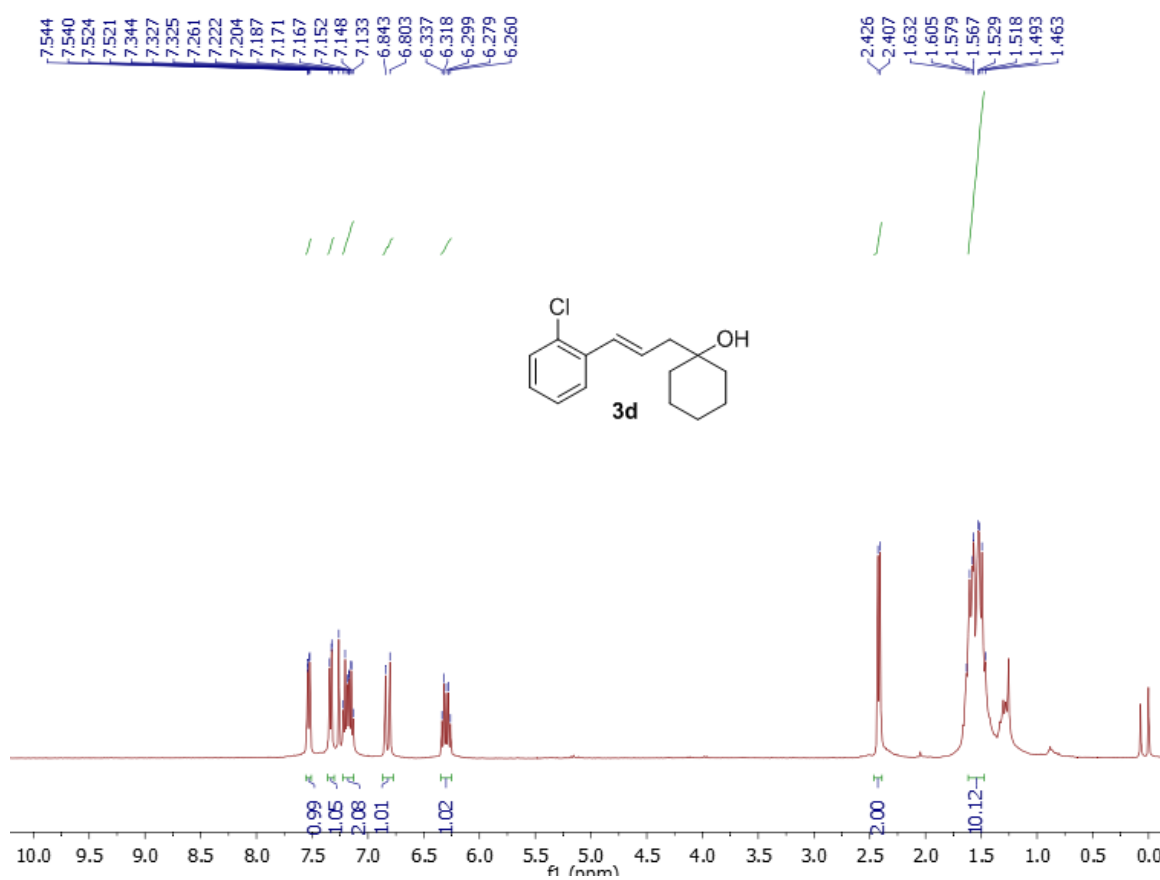

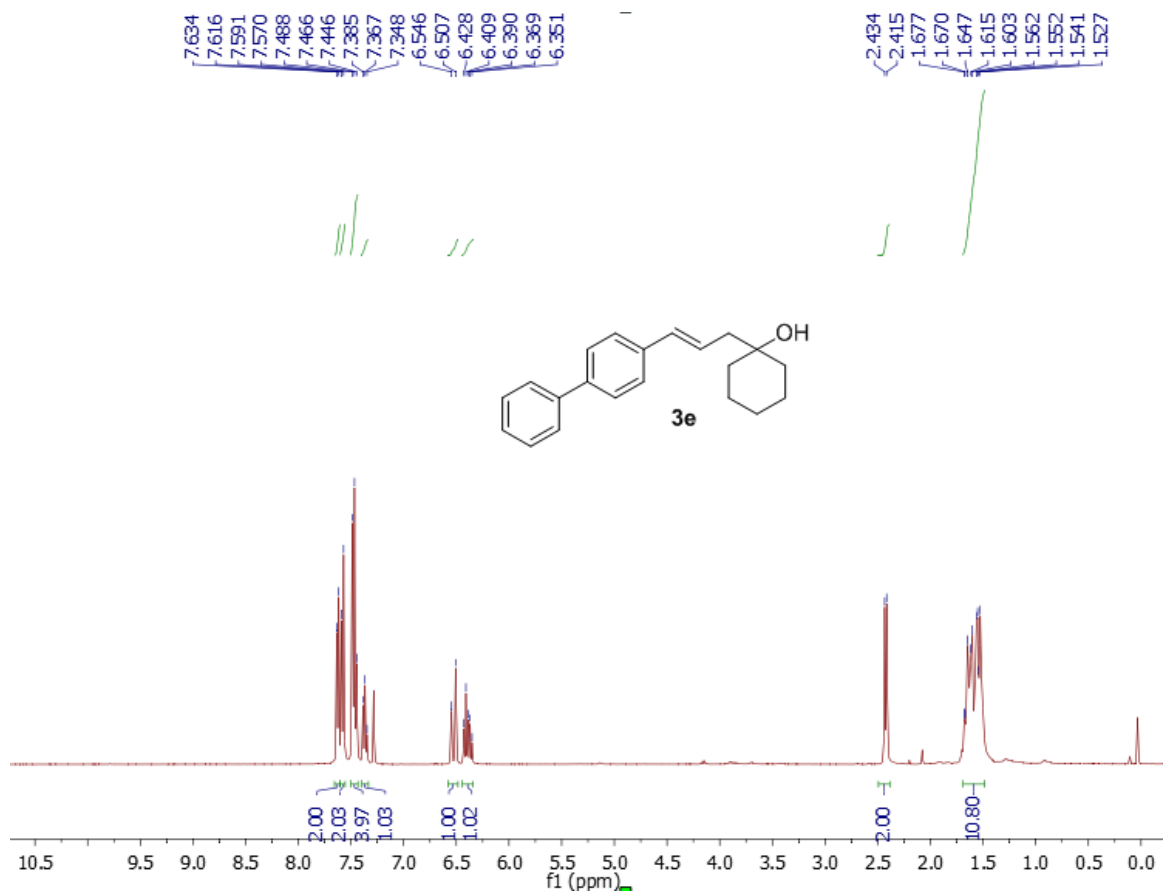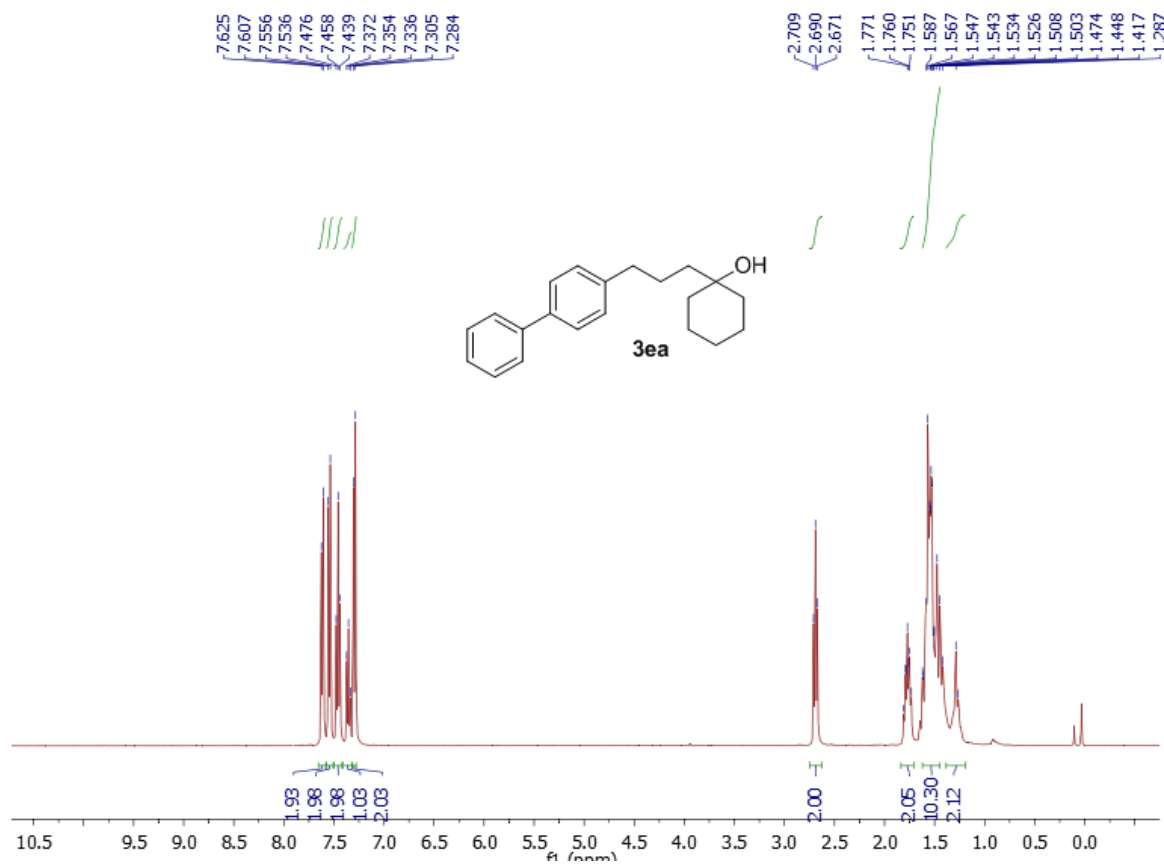

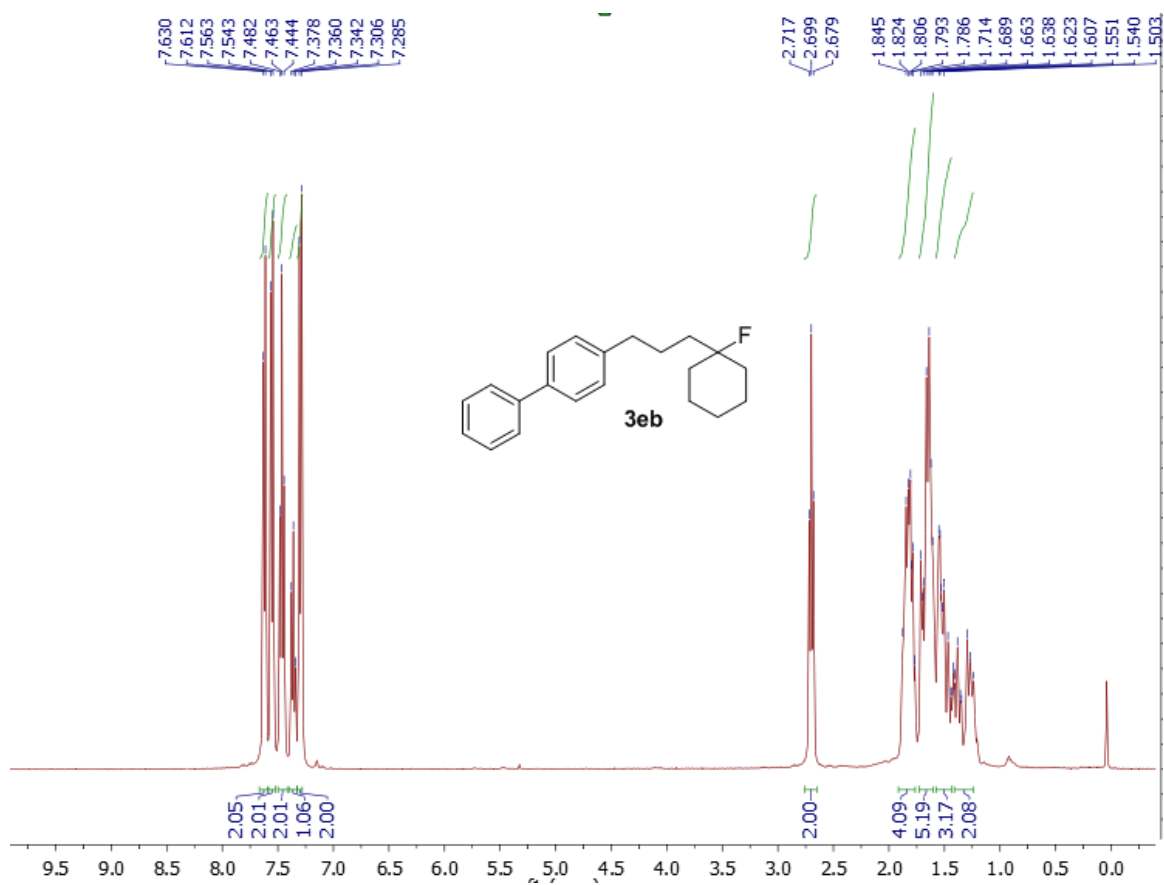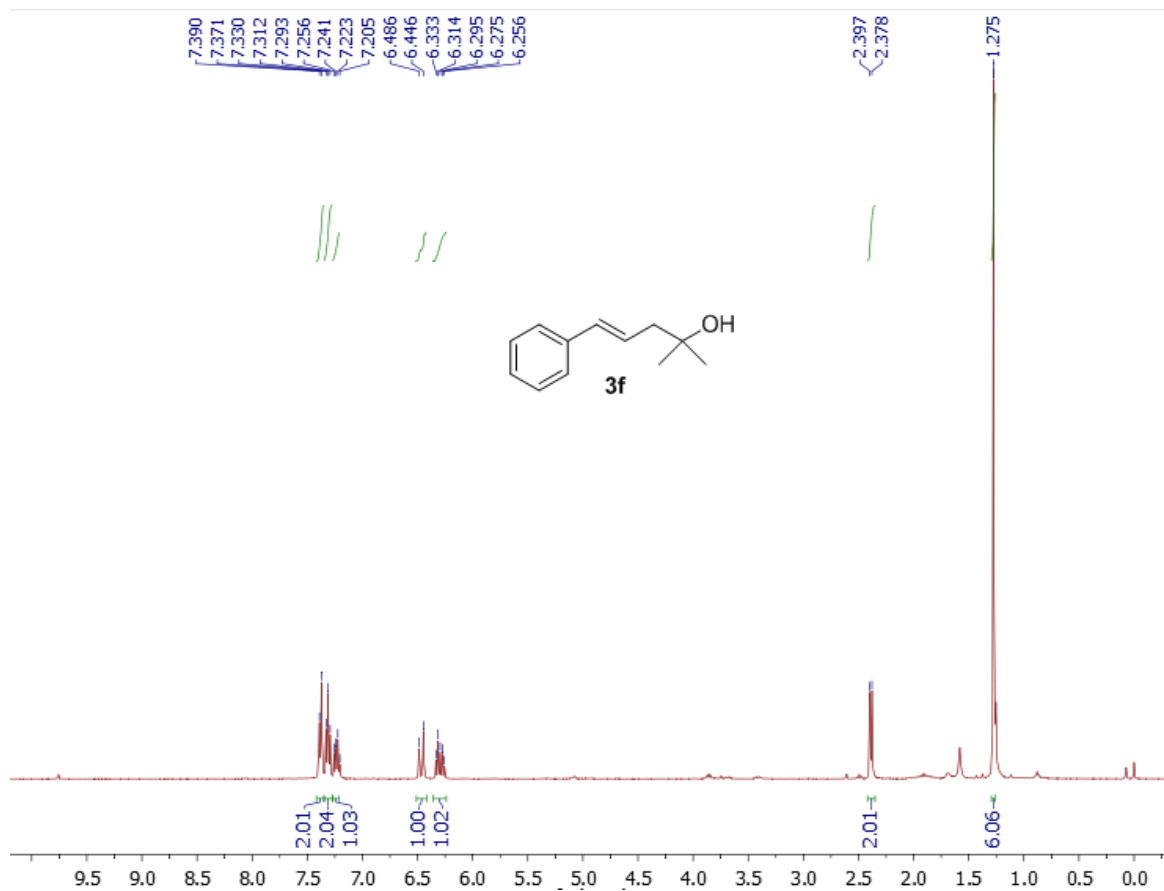



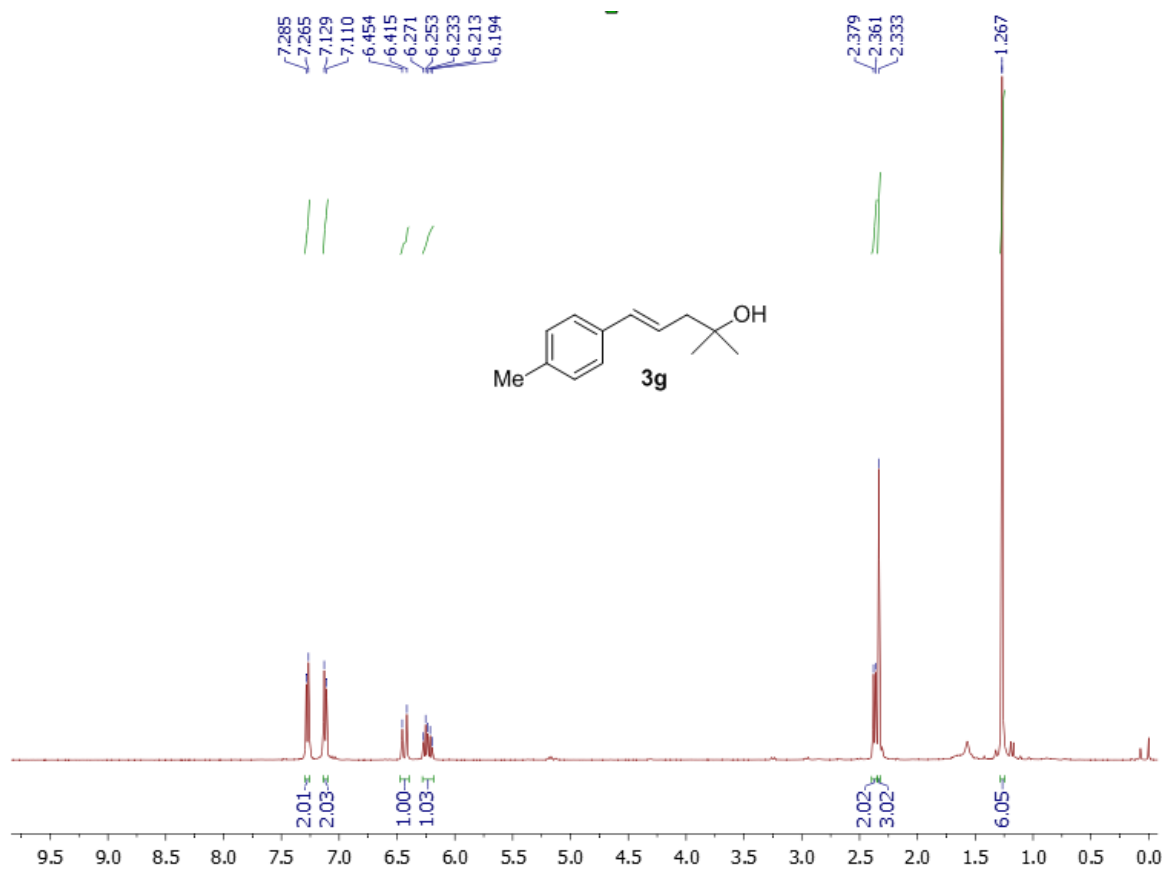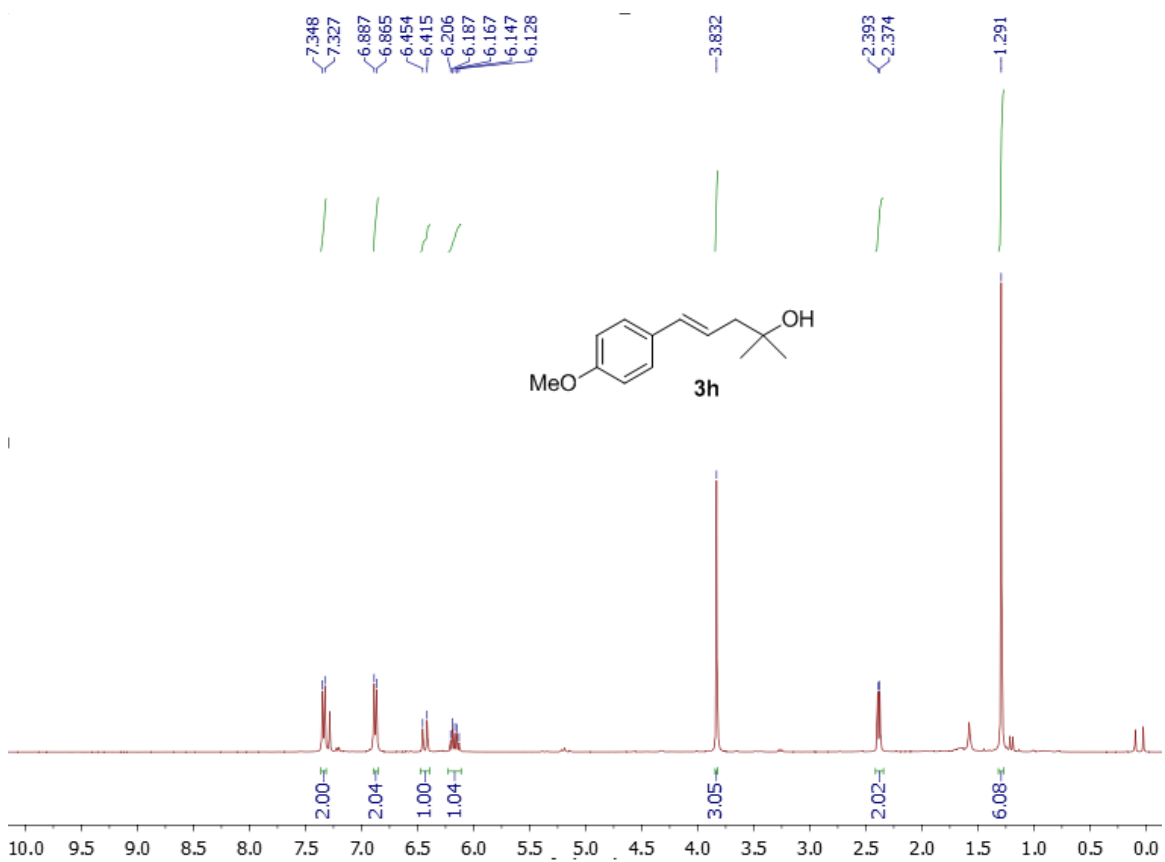

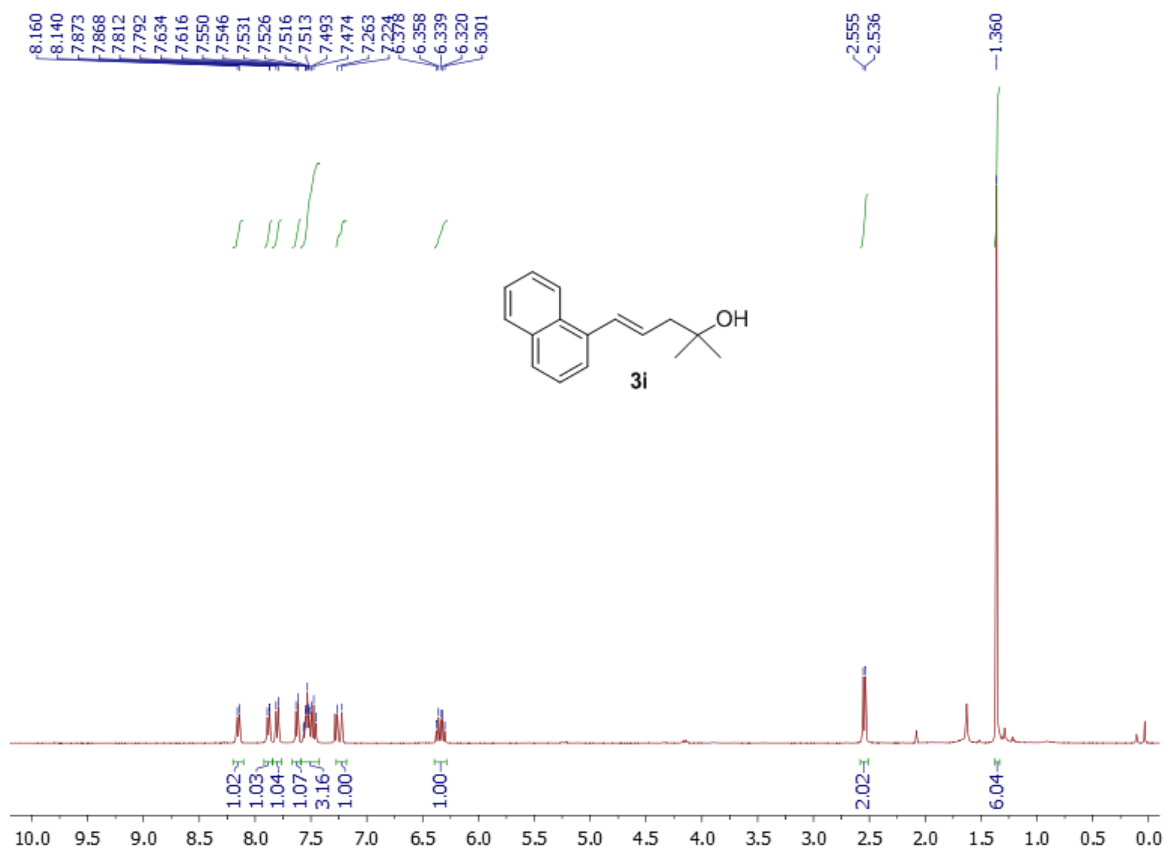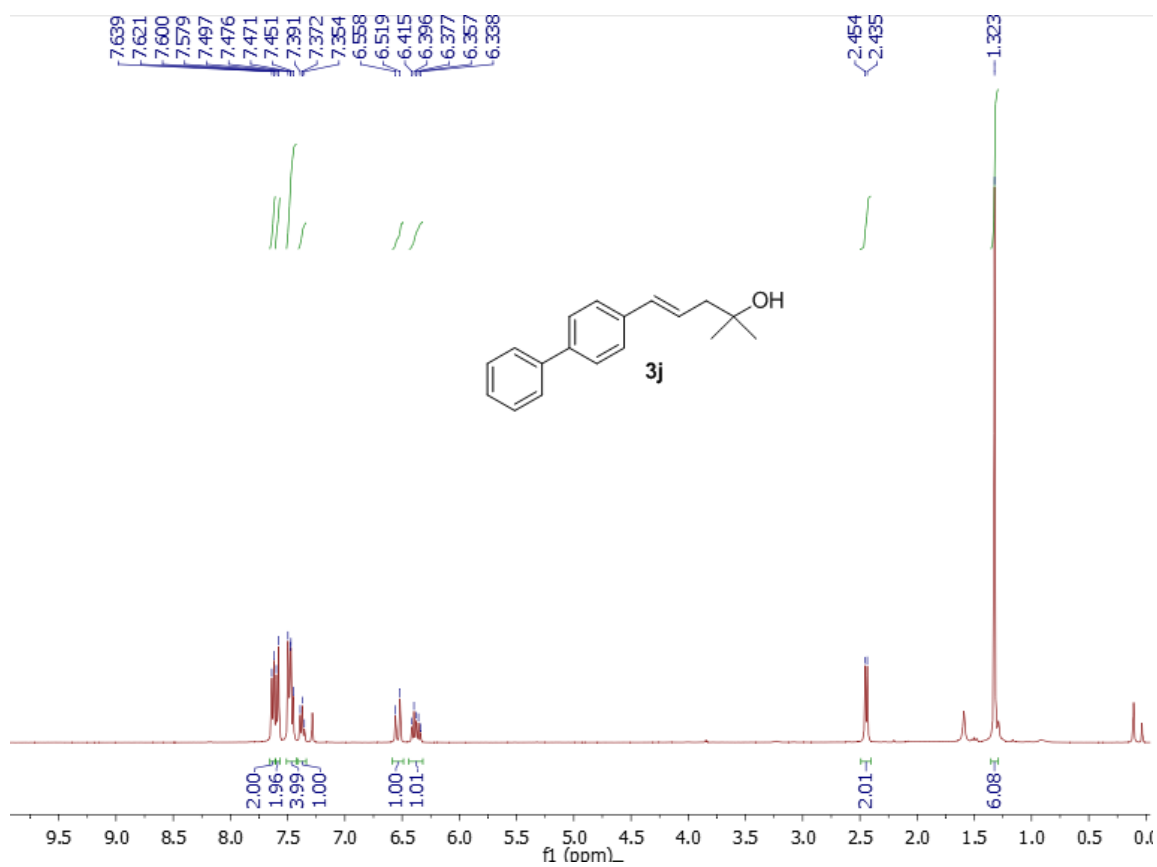

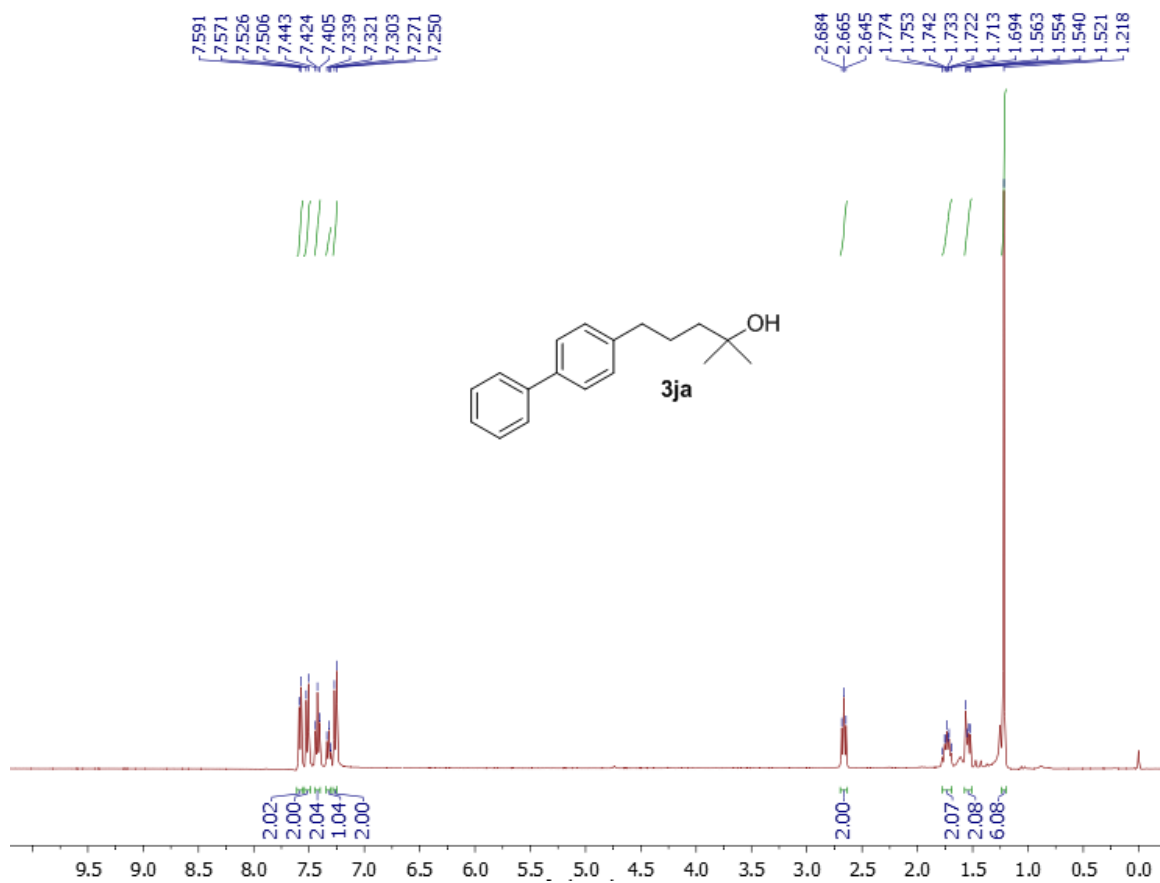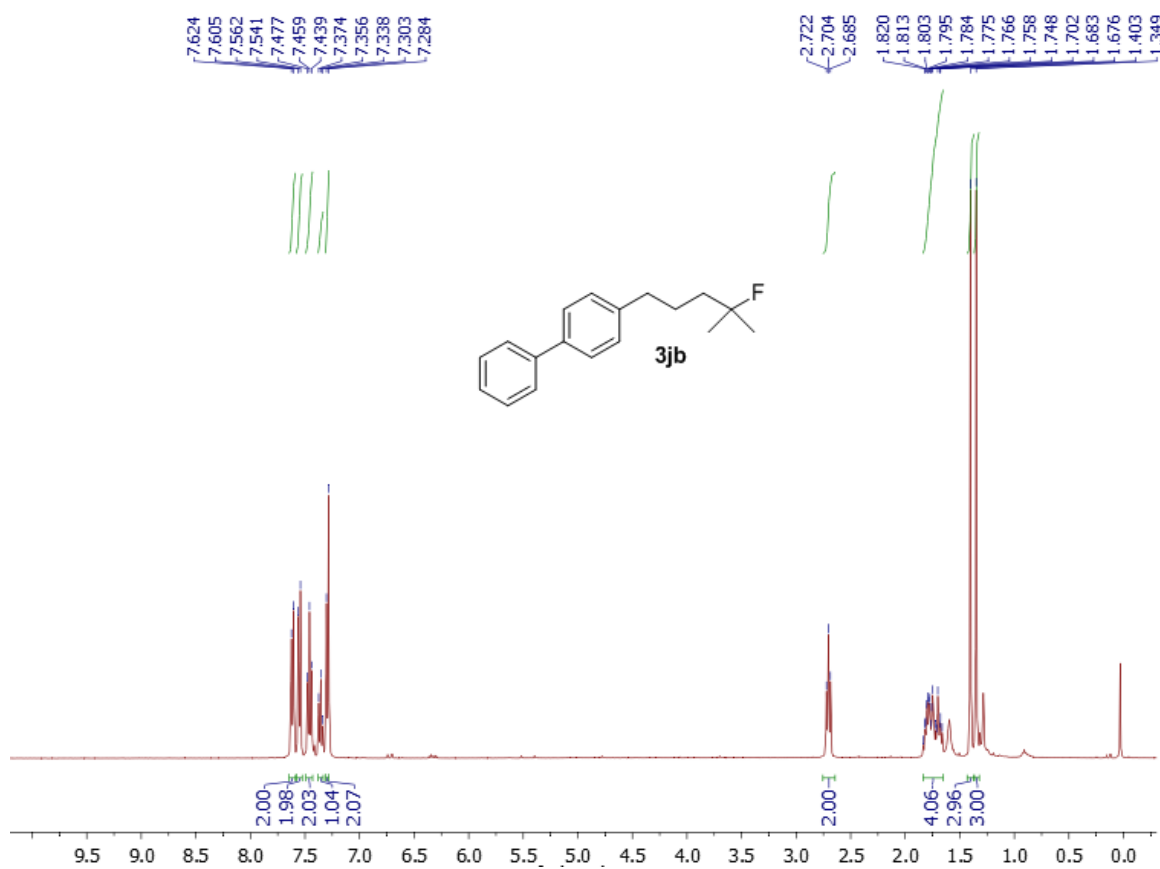

### $^{13}\text{C}$ NMR spectra

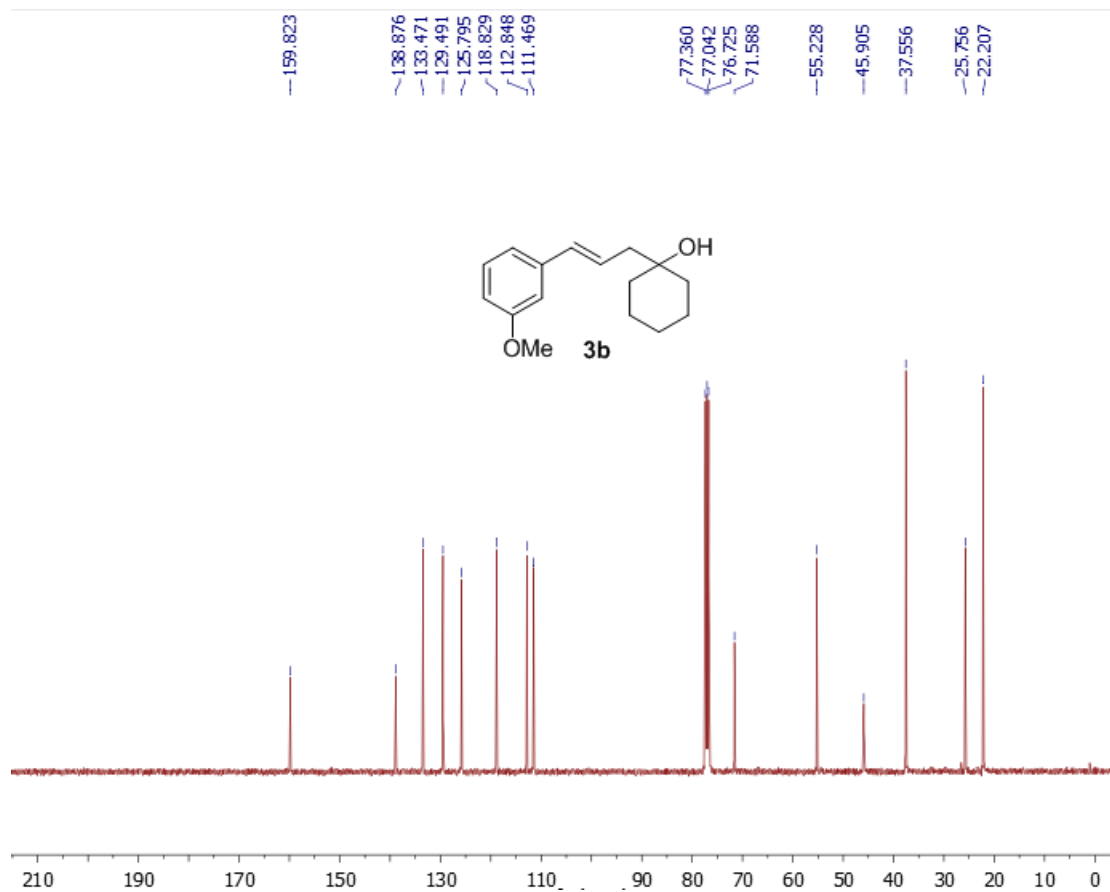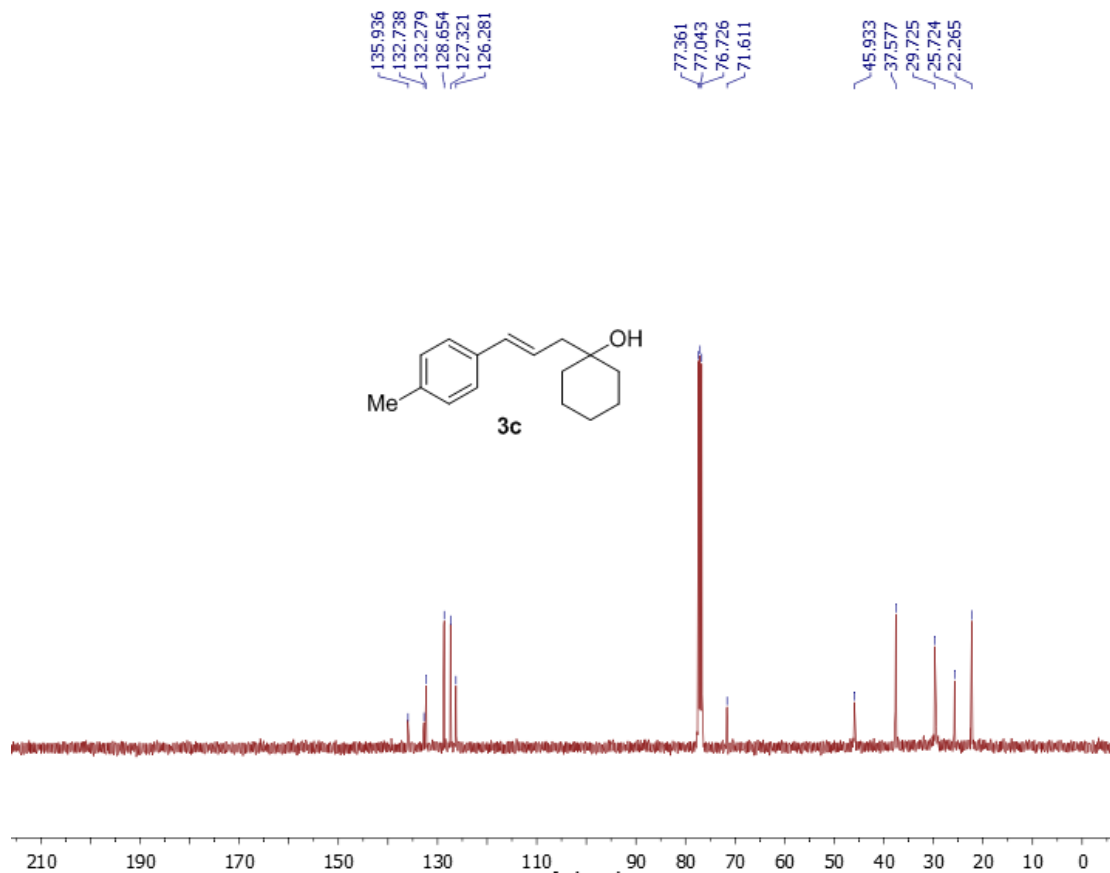

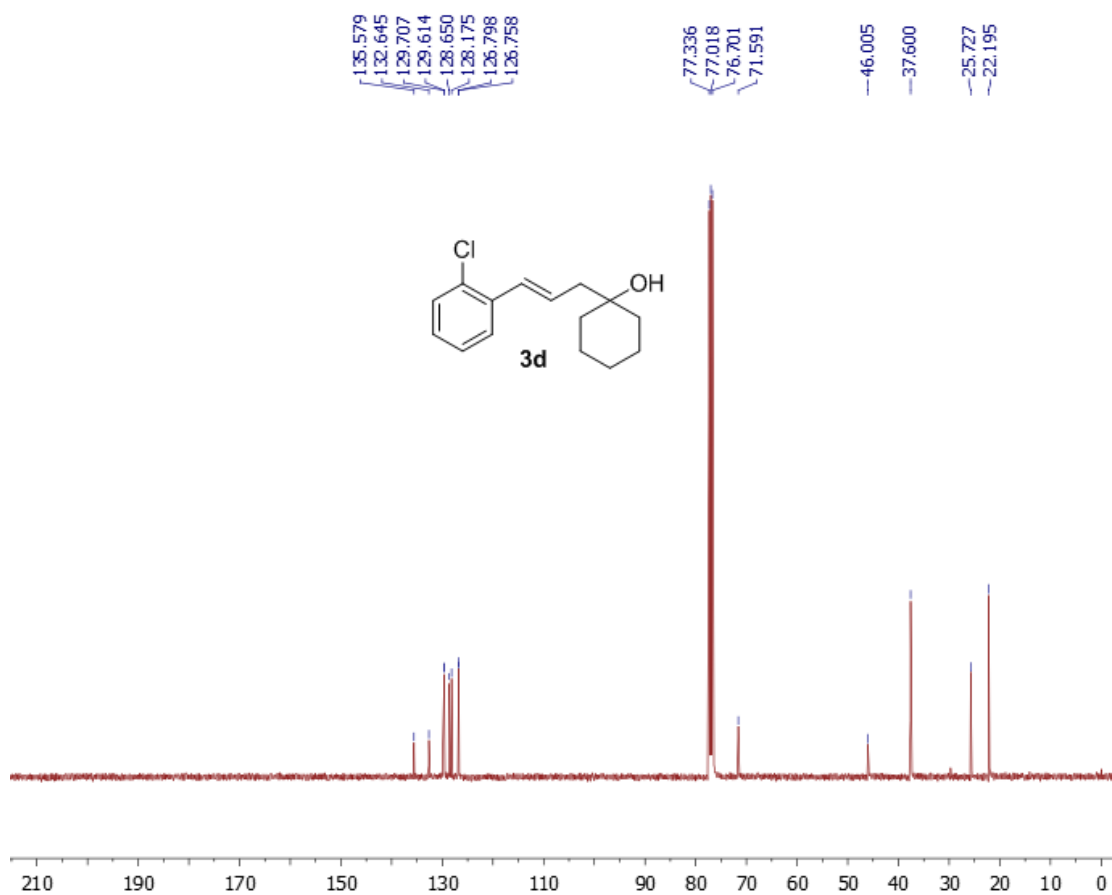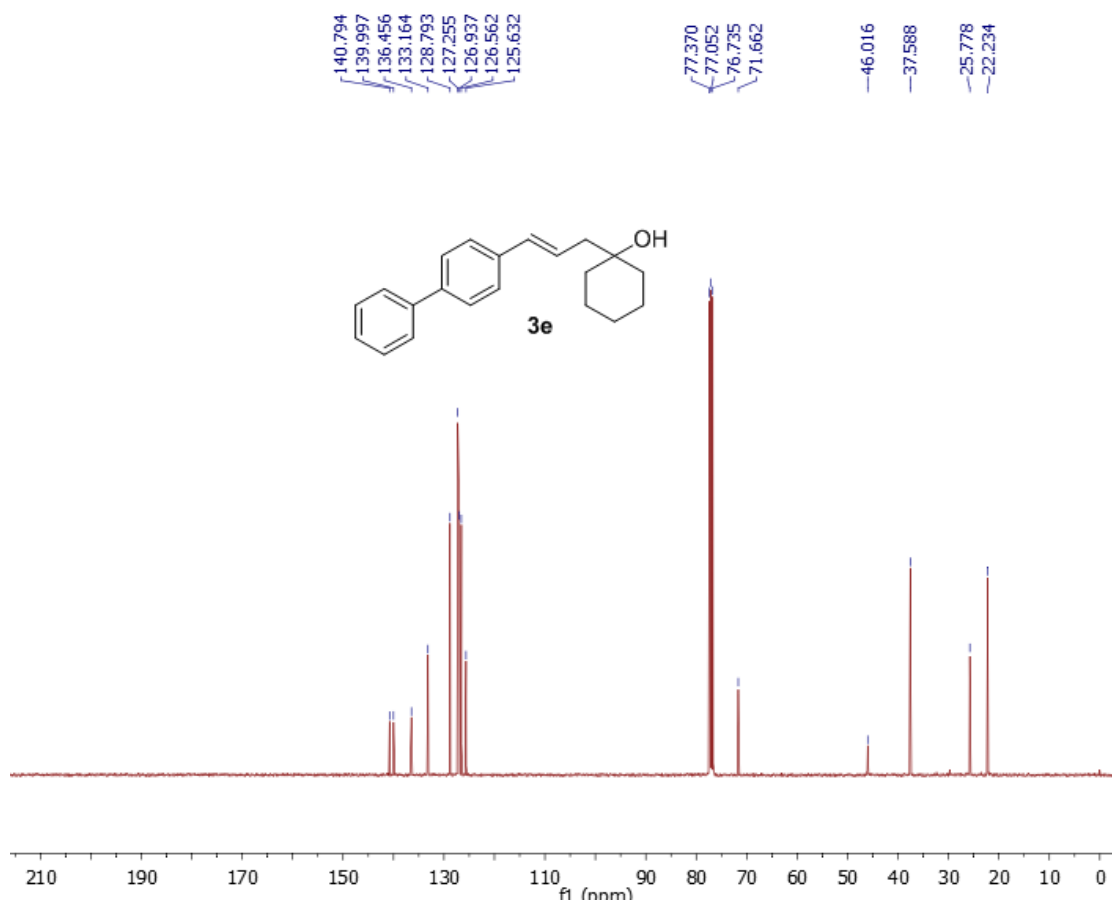

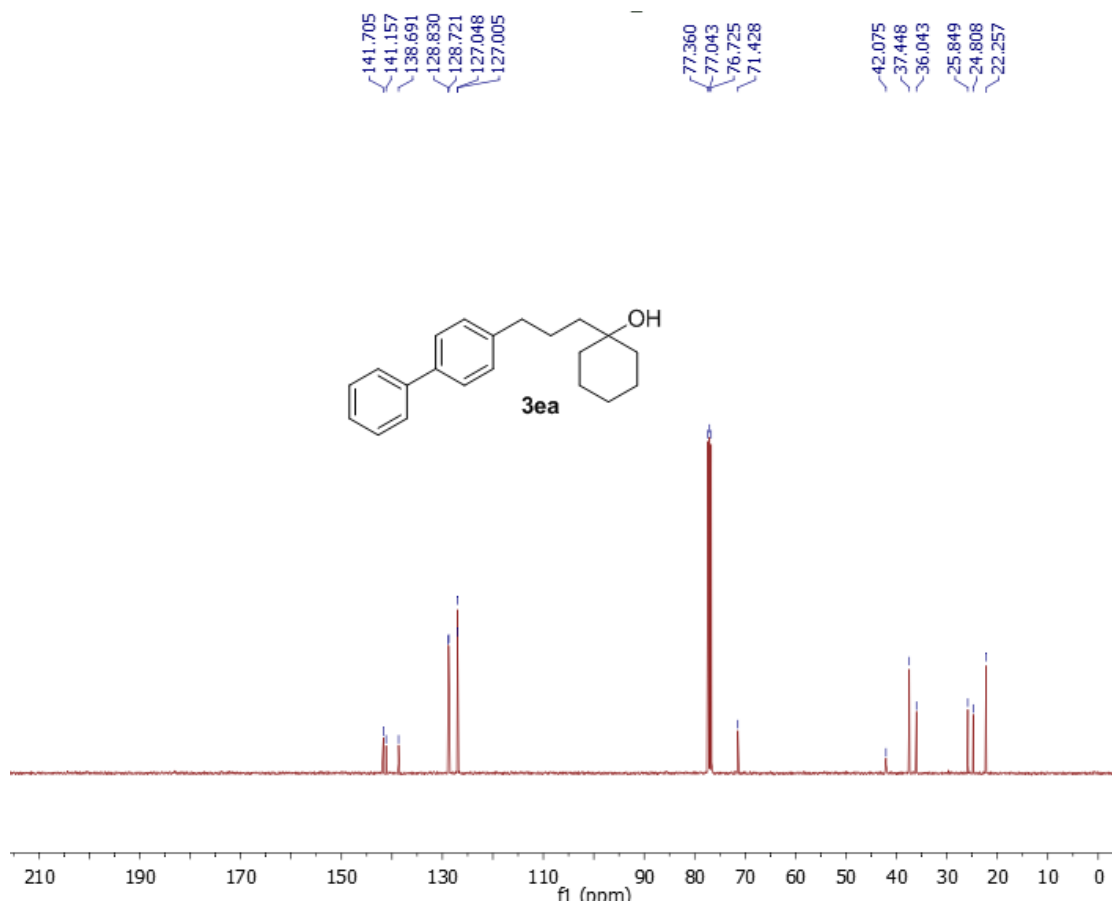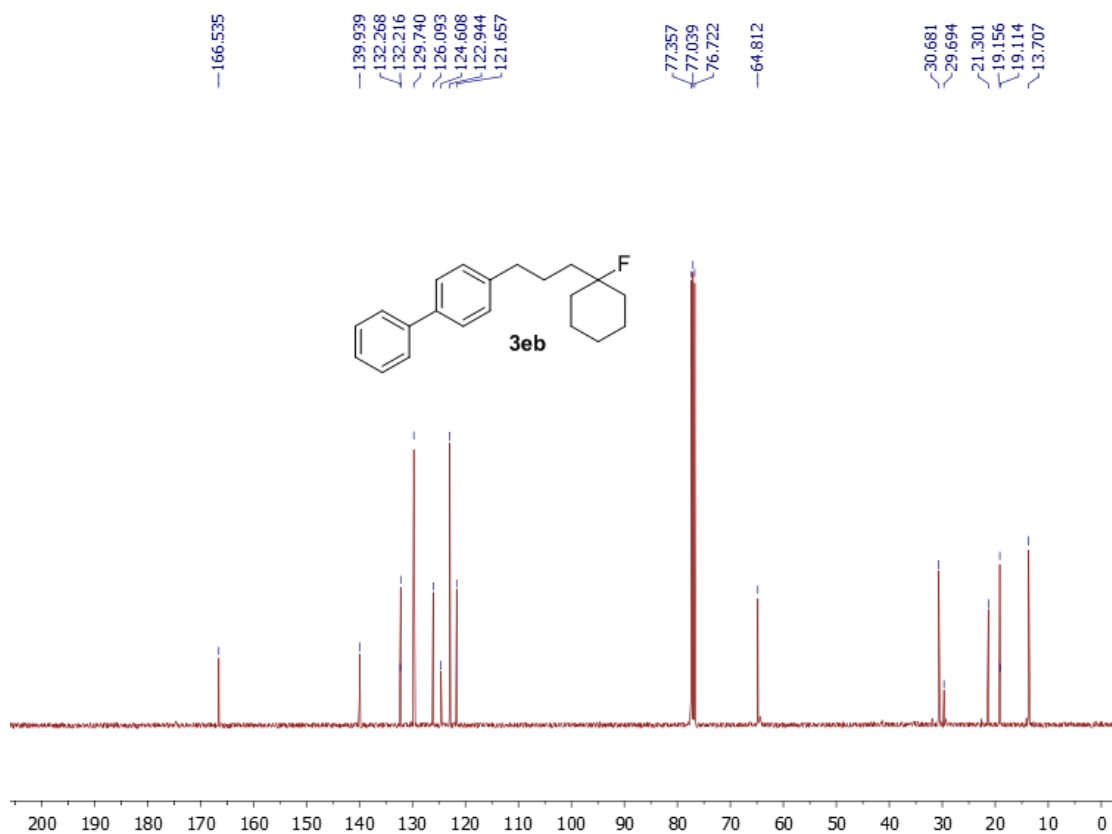

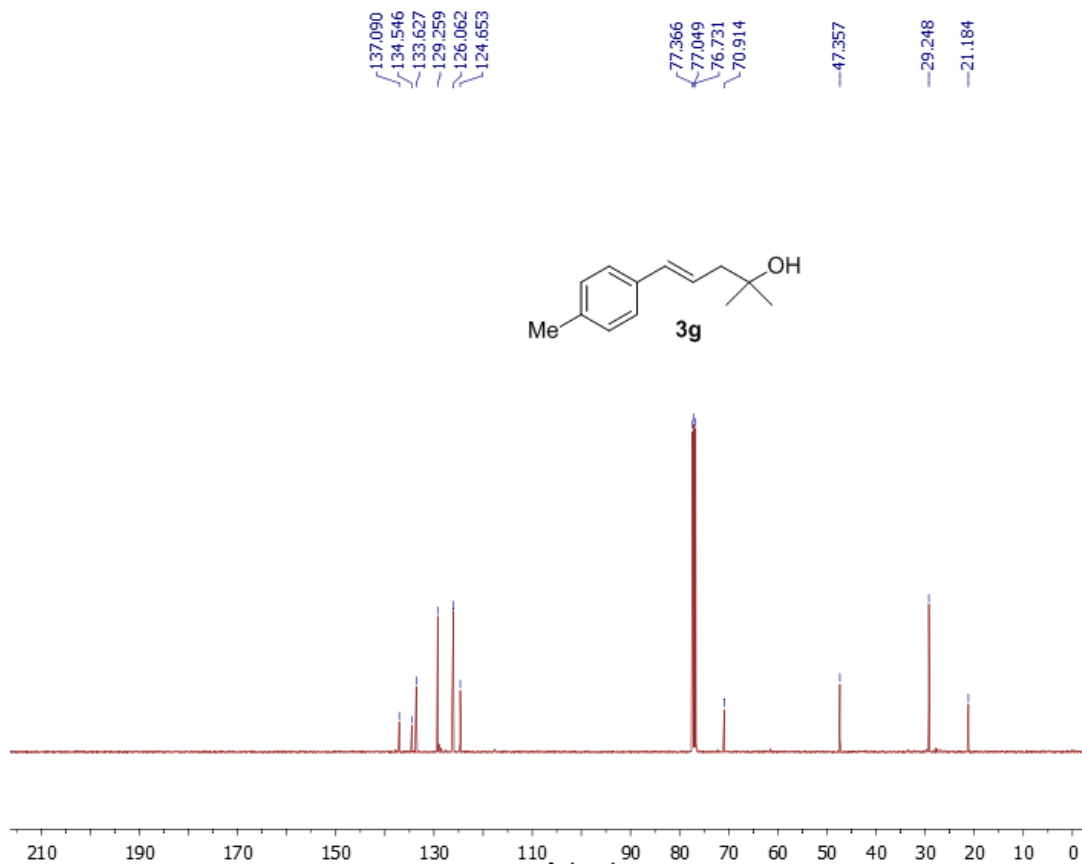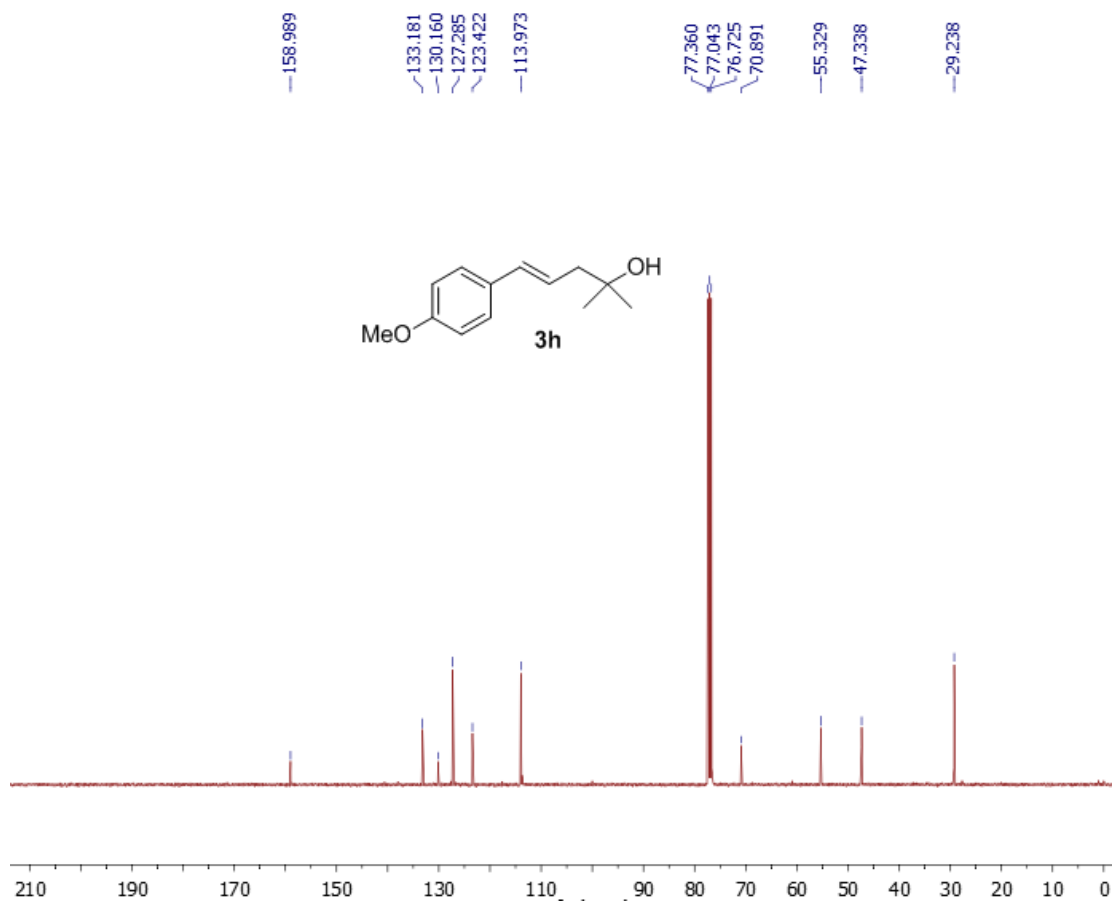

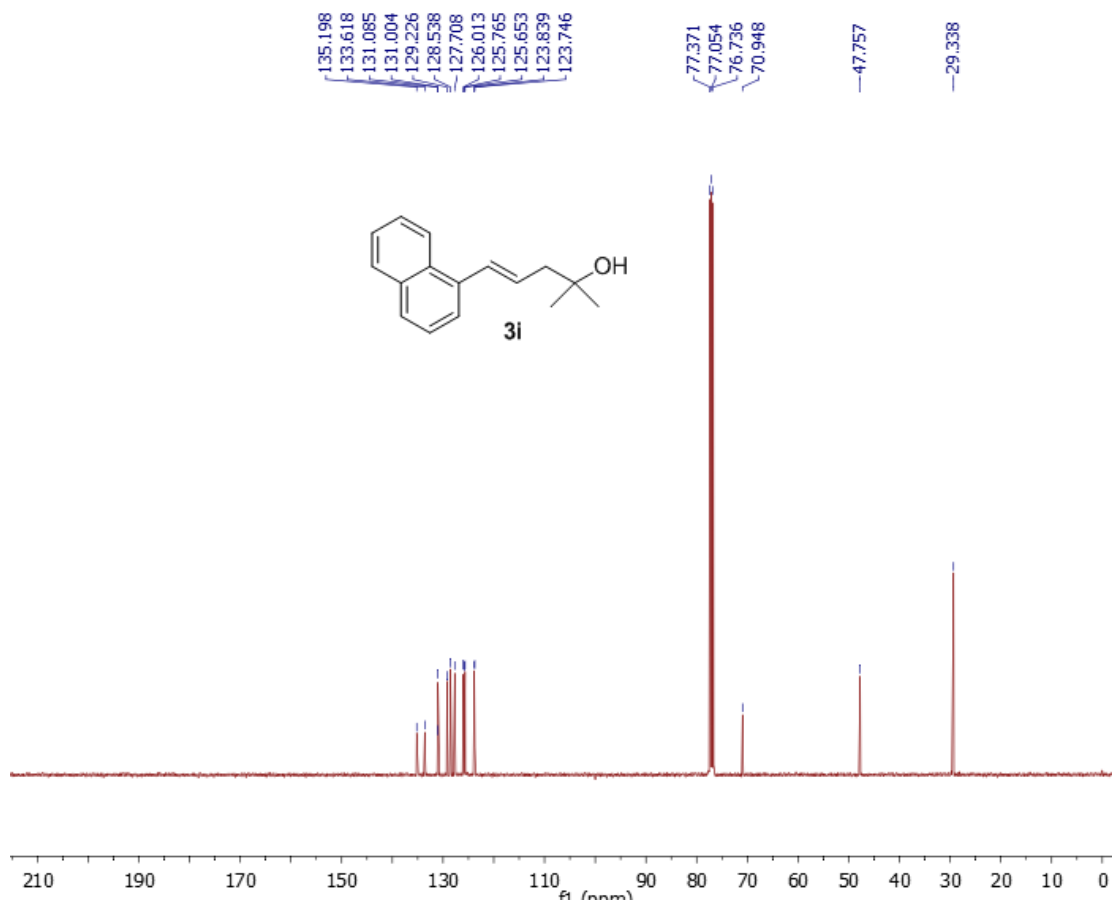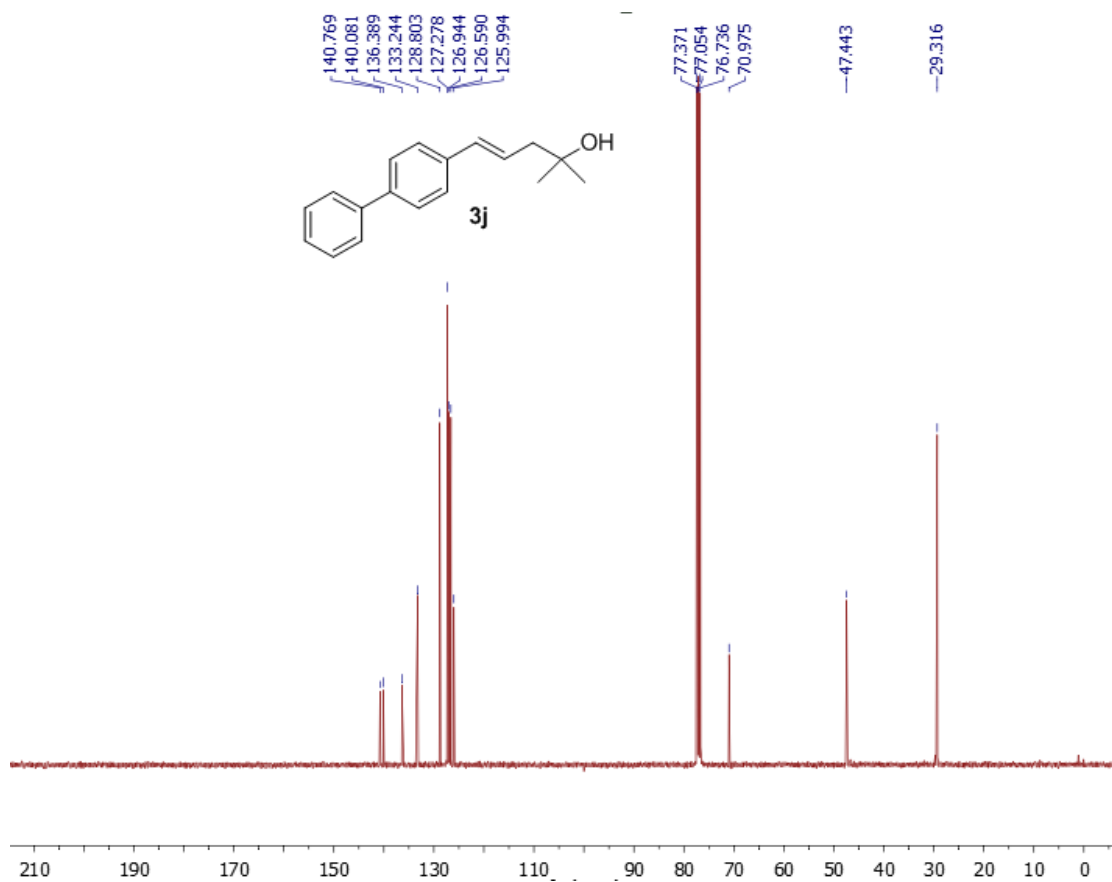



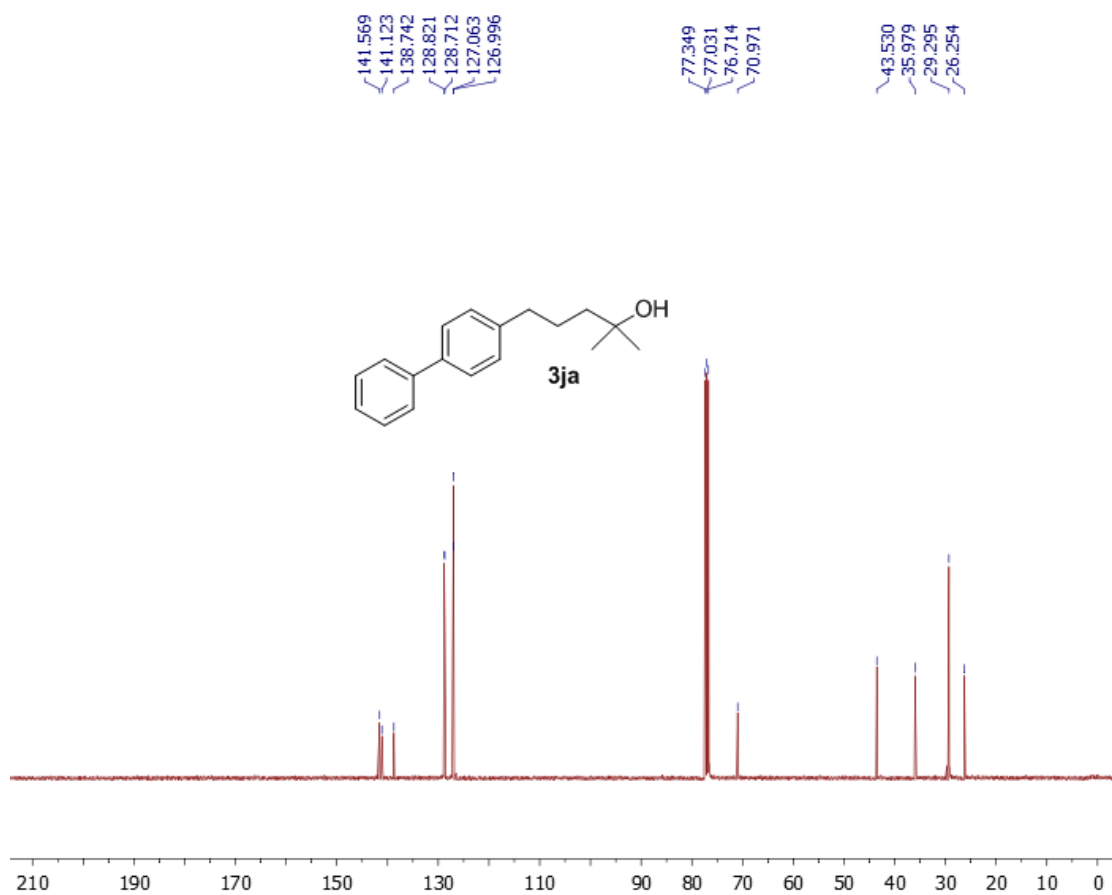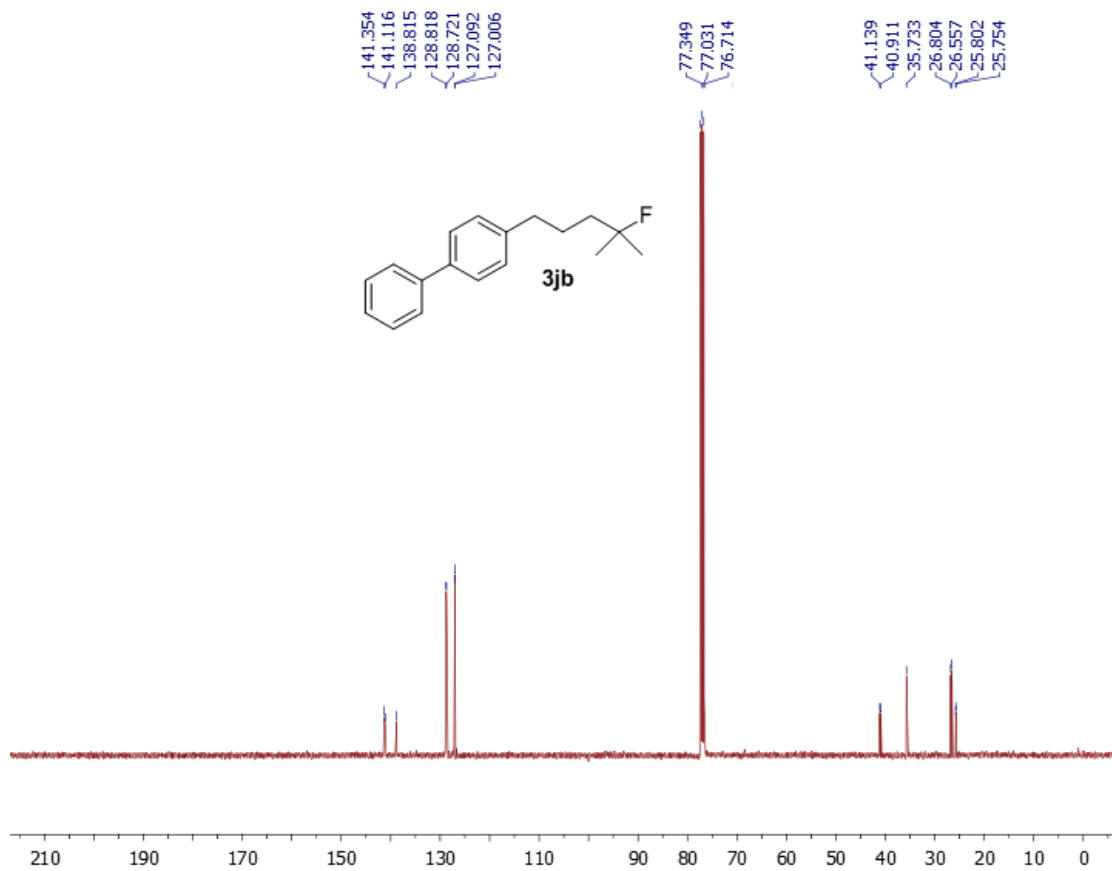

$^{19}\text{F}$  NMR spectra

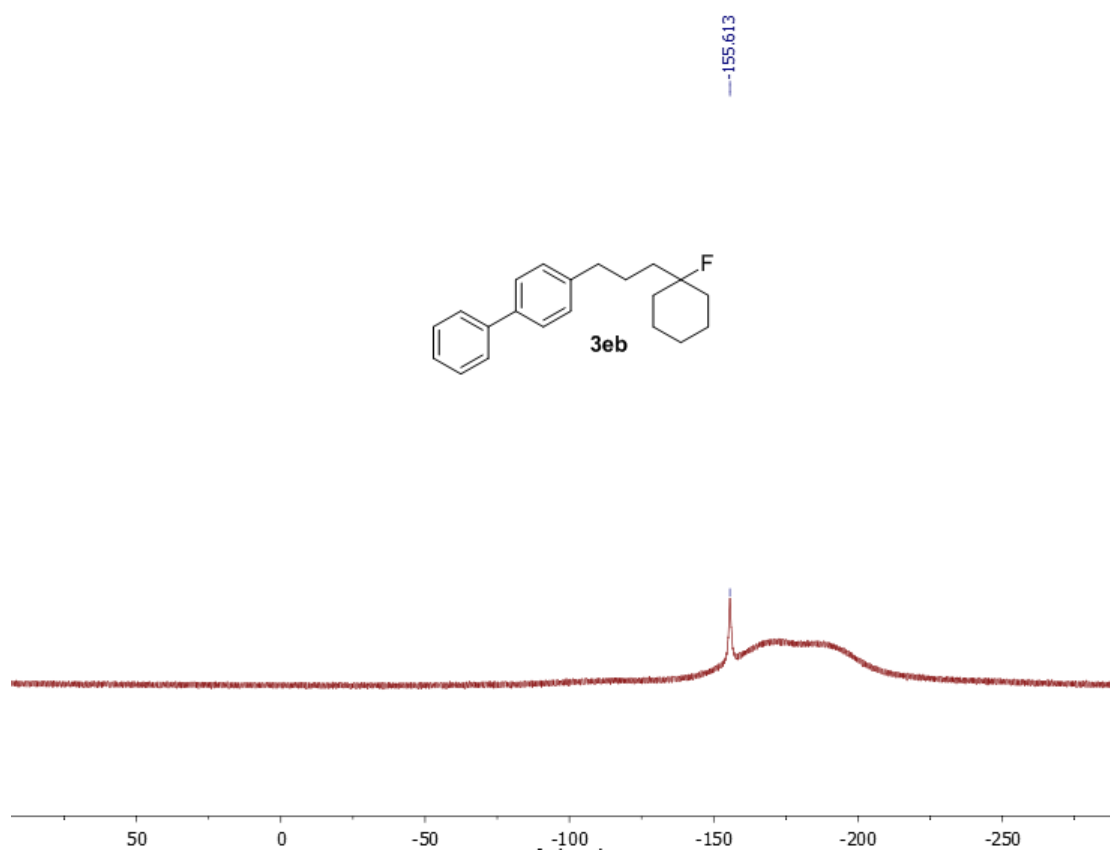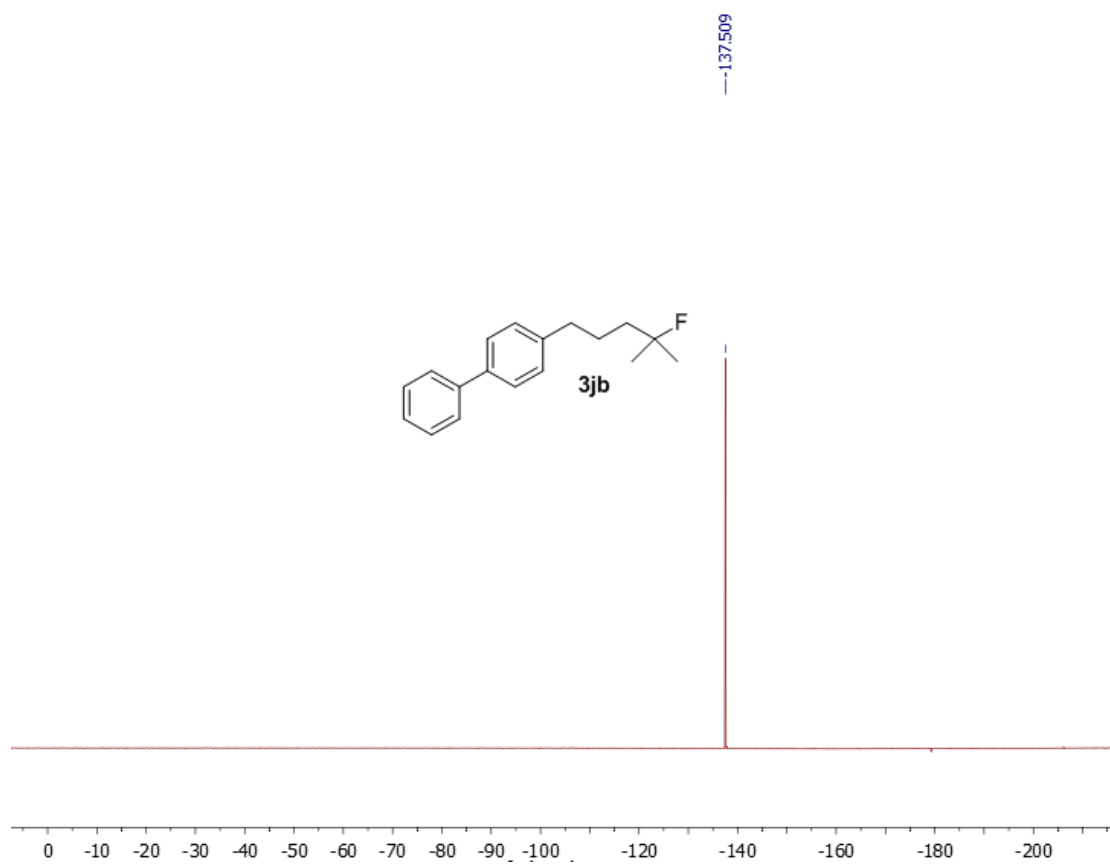

## References

1. P. Girard, J. L. Namy and H. B. Kagan, *J. Am. Chem. Soc.*, 1980, **102**, 2693.
2. S. Medegan, F. Helion and J. L. Namy, *Eur. J. Org. Chem.*, 2005, 4715.
3. G. Cahiez, A. Moyeux, J. Buendia and C. Duplais, *J. Am. Chem. Soc.*, 2007, **129**, 13788.
